# Supplementary material for: Synthesis, Structure and Photochemistry of Dibenzylidenecyclobutanones
Source: MDPI journal article supplement (doi:10.3390/molecules27217602), 2022-11-05
Supplement: s1 [file s1]

# Supplementary Materials Synthesis, Structure, and Photochemistry of Dibenzylidenecyclobutanones

Marina V. Fomina, Alexandra Ya. Freidzon, Lyudmila G. Kuz'mina, Anna A. Moiseeva, Roman. O. Starostin, Nikolai A. Kurchavov, Vyacheslav N. Nuriev, and Sergey P. Gromov\*

## CONTENT:

|     |                                                                                                                                                                                         |    |
|-----|-----------------------------------------------------------------------------------------------------------------------------------------------------------------------------------------|----|
| I   | The geometric parameters of molecules <b>1b-d</b> and <b>2</b> , X-ray diffraction experiments, crystallographic characteristics and structure refinement details, (Tables S1-S5).....  | 2  |
| II  | The <sup>1</sup> H NMR, <sup>13</sup> C NMR, NOESY NMR and HRMS spectra of compounds <b>1a-f</b> , NOESY NMR spectrum of compound <b>1c</b> (Figures S1-S19).....                       | 5  |
| III | Fluorescence spectra of compounds <b>1c-f</b> (Figure S20) .....                                                                                                                        | 18 |
| IV  | Quantum chemical calculations, orbitals involved in the first electron transition of compounds <b>1b-f</b> (Figures S21-S25) .....                                                      | 19 |
| V   | Quantum chemical calculations, potential energy profiles of the ground S0 and lowest excited states of compounds <b>1a-f</b> (Figures S26-S32) .....                                    | 24 |
| VI  | Correlations between the calculated frontier orbital energies, ionization potential and electron affinities, and experimental oxidation and reduction potentials (Figures S33-S35)..... | 28 |

# I X-ray diffraction experiments, crystallographic characteristics and structure refinement details (Tables S1-S5)

**Table S1.** Selected bond lengths (d, Å) and bond angles ( $\omega$ , °) in molecules **1b-f**.

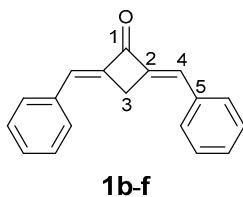

| Bond/<br>structure | 1b       | 1c       | 1d       | 1e                    | 1f (A)                | 1f (B)                |
|--------------------|----------|----------|----------|-----------------------|-----------------------|-----------------------|
| C1-O1              | 1.213(2) | 1.213(3) | 1.219(3) | 1.219(4)              | 1.225(2)              | 1.223(2)              |
| C1-C2              | 1.481(2) | 1.484(3) | 1.480(2) | 1.486(5)/<br>1.484(5) | 1.485(2)/<br>1.488(2) | 1.486(2)/<br>1.488(2) |
| C2-C3              | 1.530(2) | 1.529(3) | 1.530(2) | 1.537(5)/<br>1.531(5) | 1.531(2)/<br>1.532(2) | 1.534(2)/<br>1.526(2) |
| C2-C4              | 1.334(2) | 1.337(3) | 1.335(2) | 1.339(5)/<br>1.340(5) | 1.344(2)/<br>1.344(2) | 1.339(2)/<br>1.340(2) |
| C4-C5              | 1.454(2) | 1.454(3) | 1.451(2) | 1.451(5)/<br>1.454(5) | 1.448(2)/<br>1.454(2) | 1.453(2)/<br>1.455(2) |
| C2-C1-C2           | 91.0(2)  | 90.9(2)  | 91.1(2)  | 91.0(3)               | 90.8(1)               | 90.8(1)               |
| C1-C2-C3           | 90.8(1)  | 90.8(2)  | 98.8(1)  | 90.7(3)/<br>91.0(3)   | 91.0(1)/<br>90.8(1)   | 90.7(1)/<br>90.9(1)   |
| C2-C3-C2           | 87.3(2)  | 87.6(2)  | 87.3(2)  | 87.3(2)               | 87.4(1)               | 87.6(1)               |
| C1-C2-C4           | 128.7(1) | 129.6(2) | 130.1(1) | 132.0(3)/<br>132.1(3) | 131.9(1)/<br>132.3(1) | 132.5(1)/<br>131.8(1) |
| C3-C2-C4           | 140.5(1) | 139.6(2) | 139.0(2) | 137.3(3)/<br>136.8(3) | 136.9(1)/<br>136.9(1) | 136.8(1)/<br>137.2(1) |
| C2-C4-C5           | 131.2(1) | 130.2(2) | 130.6(2) | 128.5(3)/<br>128.2(3) | 128.0(1)/<br>128.3(1) | 128.5(1)/<br>128.4(1) |

**TableS2.** Selected bond lengths (d, Å) and bond angles ( $\omega$ , °) in molecules *syn,syn-2* and *anti,anti-2*.

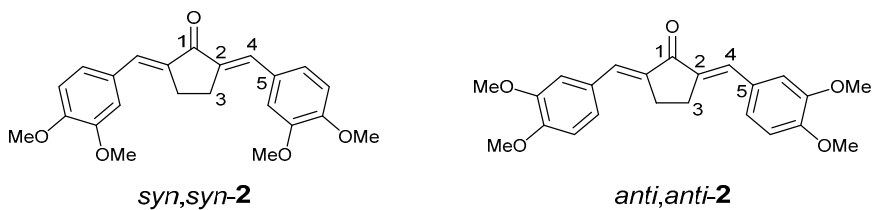

| Bond  | d ( <i>syn,syn-2</i> ) | d ( <i>anti,anti-2</i> ) | Angle    | $\omega$ ( <i>syn,syn-2</i> ) | $\omega$ ( <i>anti,anti-2</i> ) |
|-------|------------------------|--------------------------|----------|-------------------------------|---------------------------------|
| C1-C2 | 1.484(2)/<br>1.483(2)  | 1.481(3)/<br>1.481(3)    | C1-C2-C4 | 120.5(1)/<br>120.5(1)         | 120.7(2)/<br>120.4(2)           |
| C2-C4 | 1.346/<br>1.343(2)     | 1.338(3)/<br>1.343(3)    | C3-C2-C4 | 130.4(1)/<br>130.8(1)         | 130.0(2)/<br>130.3(2)           |
| C4-C5 | 1.455/<br>1.454(2)     | 1.459(2)/<br>1.456(3)    | C2-C4-C5 | 130.7(1)/<br>131.1(1)         | 131.0(2)/<br>131.0(2)           |

**Table S3.** Crystallographic parameters and X-ray experiment details for **1b-d**.

| Dienone | 1b | 1c | 1d |
|---------|----|----|----|
|---------|----|----|----|

|                                       |                                                   |                                                   |                                                   |
|---------------------------------------|---------------------------------------------------|---------------------------------------------------|---------------------------------------------------|
| Molecular formula                     | C <sub>20</sub> H <sub>18</sub> O <sub>3</sub> ,  | C <sub>22</sub> H <sub>22</sub> O <sub>5</sub> ,  | C <sub>20</sub> H <sub>18</sub> OS <sub>2</sub> , |
| Molecular weight, g·mol <sup>-1</sup> | 306.34                                            | 366.40                                            | 338.46                                            |
| Temperature, K                        | 296                                               | 296                                               | 296                                               |
| Crystal system                        | Monocl.                                           | Monocl.                                           | Monocl.                                           |
| Space group                           | C2/c                                              | C2/c                                              | C2/c                                              |
| a (Å)                                 | 11.9333(5)                                        | 17.5713(12)                                       | 11.4919(4)                                        |
| b (Å)                                 | 12.6418(5)                                        | 13.7149(11)                                       | 13.3354(5)                                        |
| c (Å)                                 | 11.0532(5)                                        | 8.1128(6)                                         | 11.8054(6)                                        |
| α (°)                                 | 90                                                | 90                                                | 90                                                |
| β (°)                                 | 108.198(2)                                        | 103.522(3)                                        | 110.904(2)                                        |
| γ (°)                                 | 90                                                | 90                                                | 90                                                |
| V (Å <sup>3</sup> )                   | 1584.07(12)                                       | 1900.9(2)                                         | 1690.09(12)                                       |
| Z                                     | 4                                                 | 4                                                 | 4                                                 |
| ρ <sub>calc</sub> , g/cm <sup>3</sup> | 1.285                                             | 1.273                                             | 1.330                                             |
| μ(MoKα), mm <sup>-1</sup>             | 0.086                                             | 0.090                                             |                                                   |
| Crystal size                          | 0.54 × 0.46 × 0.42                                | 0.54 × 0.42 × 0.38                                | 0.46 × 0.14 × 0.014                               |
| Scan range on 2θ, deg.                | 4.82 – 52.74                                      | 3.8 – 54.62                                       | 4.88–53.38                                        |
| Index range                           | -14 ≤ h ≤ 14, -15 ≤ k ≤ 15, -13 ≤ l ≤ 13          | -22 ≤ h ≤ 22, -17 ≤ k ≤ 17, -10 ≤ l ≤ 10          | -13 ≤ h ≤ 14, -16 ≤ k ≤ 14, -14 ≤ l ≤ 14          |
| Number of measured refl.              | 7871                                              | 9410                                              | 8466                                              |
| Number of independent refl.           | 1617 [Rint = 0.0406, Rsigma = 0.0298]             | 2110 [Rint = 0.0610, Rsigma = 0.0467]             | 1747 [Rint = 0.0452, Rsigma = 0.0369]             |
| [R(int)]                              |                                                   |                                                   |                                                   |
| Number of refl with I > 2σ(I)         | 1323                                              | 1577                                              | 1377                                              |
| Number of variables                   | 107                                               | 126                                               | 107                                               |
| GOOF                                  | 1.052                                             | 1.029                                             | 1.038                                             |
| R indices for I > 2σ(I)               | R <sub>1</sub> = 0.0423, wR <sub>2</sub> = 0.1023 | R <sub>1</sub> = 0.0520, wR <sub>2</sub> = 0.1302 | R <sub>1</sub> = 0.0469, wR <sub>2</sub> = 0.1086 |
| R indices for all refl.               | R <sub>1</sub> = 0.0522, wR <sub>2</sub> = 0.1086 | R <sub>1</sub> = 0.0710, wR <sub>2</sub> = 0.1427 | R <sub>1</sub> = 0.0633, wR <sub>2</sub> = 0.1175 |
| Δρ max/min, eÅ <sup>-3</sup>          | 0.12/-0.12                                        | 0.17/-0.23                                        | 0.21/-0.25                                        |

**Table S4.** Crystallographic parameters and X-ray experiment details for **1e** and **1f**.

| Dienone                                | <b>1e</b>                                         | <b>1f</b>                                            |
|----------------------------------------|---------------------------------------------------|------------------------------------------------------|
| Molecular formula                      | C <sub>22</sub> H <sub>24</sub> N <sub>2</sub> O, | 2(C <sub>26</sub> H <sub>32</sub> N <sub>2</sub> O), |
| Molecular weight, g·mol <sup>-1</sup>  | 332.43                                            | 388.53                                               |
| Temperature, K                         | 150                                               | 150                                                  |
| Crystal system                         | Monocl.                                           | Monocl.                                              |
| Space group                            | P2 <sub>1</sub> /c                                | P2 <sub>1</sub> /c                                   |
| a (Å)                                  | 7.3571(10)                                        | 17.5050(8)                                           |
| b (Å)                                  | 19.831(3)                                         | 16.6754(9)                                           |
| c (Å)                                  | 12.3034(17)                                       | 15.1879(7)                                           |
| α (°)                                  | 90                                                | 90                                                   |
| β (°)                                  | 96.130(2)                                         | 101.390(2)                                           |
| γ (°)                                  | 90                                                | 90                                                   |
| V (Å <sup>3</sup> )                    | 1784.8(4)                                         | 4346.1(4)                                            |
| Z                                      | 4                                                 | 8                                                    |
| ρ <sub>calc</sub> , g·cm <sup>-3</sup> | 1.237                                             | 1.188                                                |
| μ(MoKα), mm <sup>-1</sup>              | 0.076                                             | 0.072                                                |
| Crystal size                           | 0.36 × 0.28 × 0.18                                | 0.42 × 0.26 × 0.14                                   |
| Scan range on 2θ, deg.                 | 5.29–56                                           | 3.69–56.0                                            |
| Index range                            | 9 ≤ h ≤ 9, -26 ≤ k ≤ 26, -                        | -22 ≤ h ≤ 23, -22 ≤ k ≤ 22, -                        |

|                                          |                                       |                                        |
|------------------------------------------|---------------------------------------|----------------------------------------|
|                                          | $16 \leq l \leq 16$                   | $17 \leq l \leq 20$                    |
| Number of measured refl.                 | 17935                                 | 51909                                  |
| Number of independent refl.              | 4225 [Rint = 0.0410, Rsigma = 0.0375] | 10460 [Rint = 0.0465, Rsigma = 0.0412] |
| [R(int)]                                 |                                       |                                        |
| Number of refl with $I > 2\sigma(I)$     | 3321                                  | 7598                                   |
| Number of variables                      | 230                                   | 571                                    |
| R indices for $I > 2\sigma(I)$           | $R_1 = 0.0996$ , $wR_2 = 0.3008$      | $R_1 = 0.0572$ , $wR_2 = 0.1306$       |
| R indices for all refl.                  | $R_1 = 0.1164$ , $wR_2 = 0.3067$      | $R_1 = 0.0882$ , $wR_2 = 0.1413$       |
| GOOF                                     | 1.133                                 | 1.047                                  |
| $\Delta\rho$ max/min, $e\text{\AA}^{-3}$ | 0.61/-0.346                           | 0.47/-0.40                             |

**Table S5.** Crystallographic parameters and X-ray experiment details for **2**.

| Dienone                                    | <i>syn,syn-2</i>                               | <i>anti,anti-2</i>                             |
|--------------------------------------------|------------------------------------------------|------------------------------------------------|
| Molecular formula                          | C <sub>23</sub> H <sub>24</sub> O <sub>5</sub> | C <sub>23</sub> H <sub>24</sub> O <sub>5</sub> |
| Molecular weight, g·mol <sup>-1</sup>      | 380.42                                         | 380.42                                         |
| Temperature, K                             | 150                                            | 150                                            |
| Crystal system                             | Monocl.                                        | Monocl.                                        |
| Space group                                | P2 <sub>1</sub> /c                             | P2 <sub>1</sub> /c                             |
| a (Å)                                      | 7.9435(2)                                      | 8.7902(4)                                      |
| b (Å)                                      | 7.9435(2)                                      | 14.5194(8)                                     |
| c (Å)                                      | 27.5693(6)                                     | 15.0411(8)                                     |
| $\alpha$ (°)                               | 90                                             | 90                                             |
| $\beta$ (°)                                | 92.4020(10)                                    | 95.027(2)                                      |
| $\gamma$ (°)                               | 90                                             | 90                                             |
| V, Å <sup>3</sup>                          | 1929.22(8)                                     | 1912.29(17)                                    |
| Z                                          | 4                                              | 4                                              |
| $\rho_{\text{calc}}$ , g·cm <sup>-3</sup>  | 1.310                                          | 1.321                                          |
| $\mu(\text{MoK}\alpha)$ , mm <sup>-1</sup> | 0.092                                          | 0.092                                          |
| Crystal size, mm                           | 0.44 × 0.18 × 0.05                             | 0.46 × 0.02 × 0.01                             |
| Scan range on 2 $\theta$ , deg.            | 4.85 to 52.718                                 | 4.652 to 52.788                                |
| Index range                                | -9 ≤ h ≤ 9, -10 ≤ k ≤ 10, -34 ≤ l ≤ 34         | -10 ≤ h ≤ 10, -18 ≤ k ≤ 18, -18 ≤ l ≤ 18       |
| Number of measured refl.                   | 18751                                          | 17719                                          |
| Number of independent refl.                | 3909 [Rint = 0.0361, Rsigma = 0.0298]          | 3899 [Rint = 0.0544, Rsigma = 0.0437]          |
| [R(int)]                                   |                                                |                                                |
| Number of refl with $I > 2\sigma(I)$       | 3017                                           | 2960                                           |
| Number of variables                        | 338                                            | 273                                            |
| R indices for $I > 2\sigma(I)$             | $R_1 = 0.0382$ , $wR_2 = 0.0884$               | $R_1 = 0.0496$ , $wR_2 = 0.1013$               |
| R indices for all refl.                    | $R_1 = 0.0546$ , $wR_2 = 0.0963$               | $R_1 = 0.0703$ , $wR_2 = 0.1094$               |
| GOOF                                       | 1.022                                          | 1.043                                          |
| Residuals, min/max, e/Å <sup>3</sup>       | 0.18/-0.17                                     | 0.18/-0.25                                     |

## II The $^1\text{H}$ NMR, $^{13}\text{C}$ NMR, NOESY NMR and HRMS spectra of compounds 1a-f (Figures S1-S19)

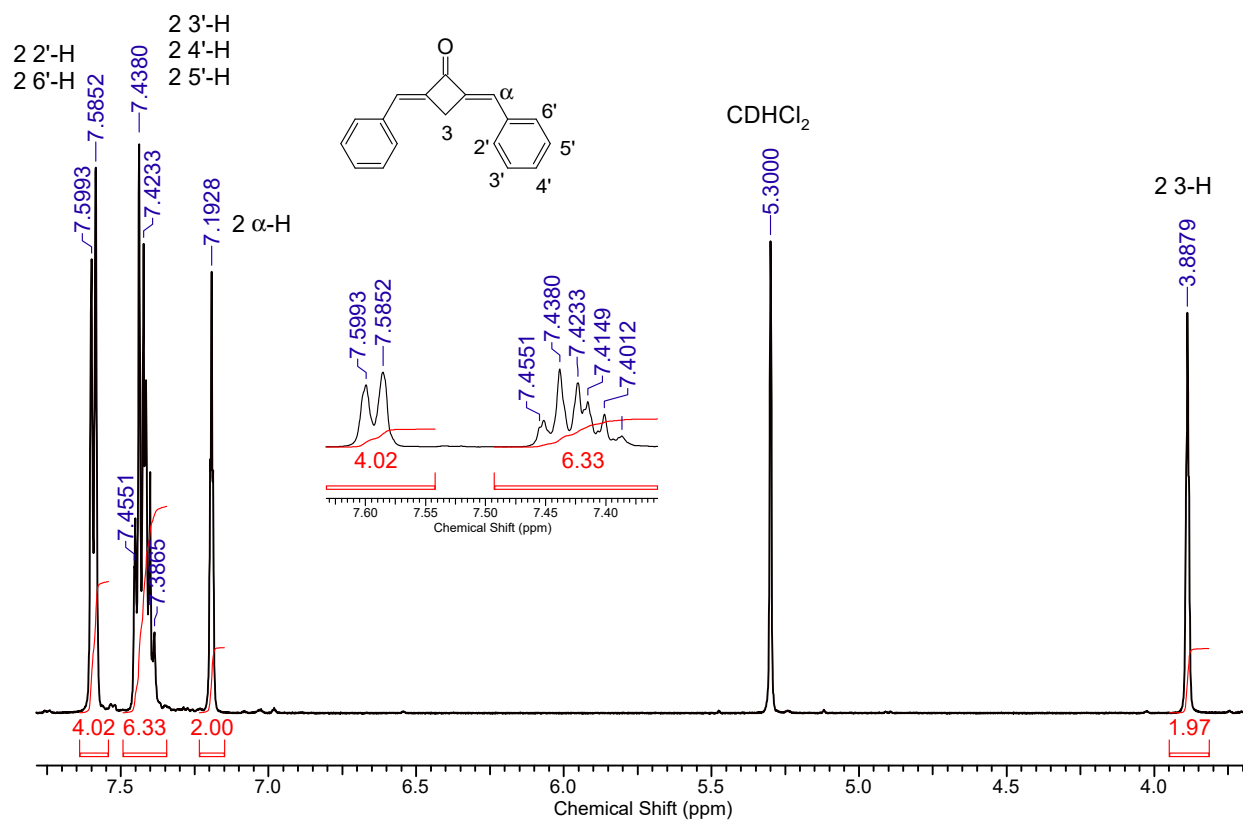

**Figure S1.**  $^1\text{H}$  NMR spectrum of compound **1a** in  $\text{CD}_2\text{Cl}_2$ .

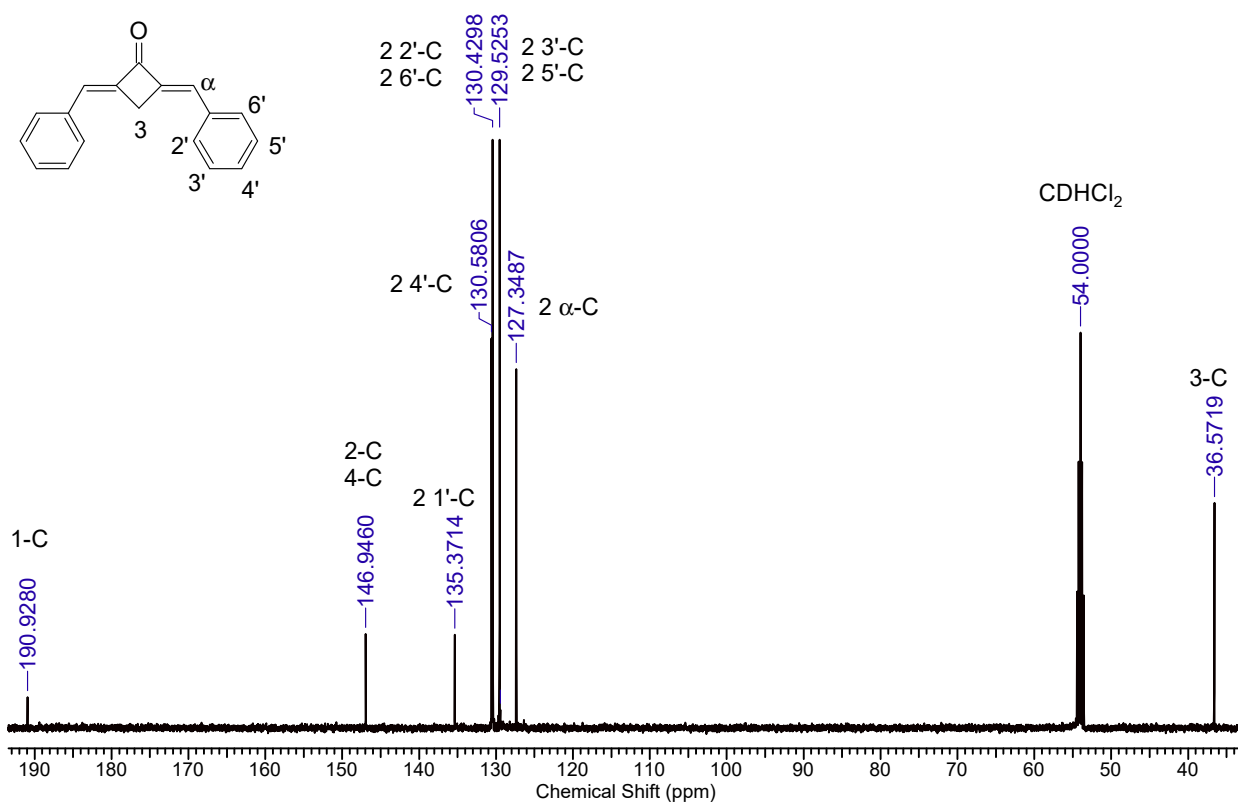

**Figure S2.**  $^{13}\text{C}$  NMR spectrum of compound **1a** in  $\text{CD}_2\text{Cl}_2$ .

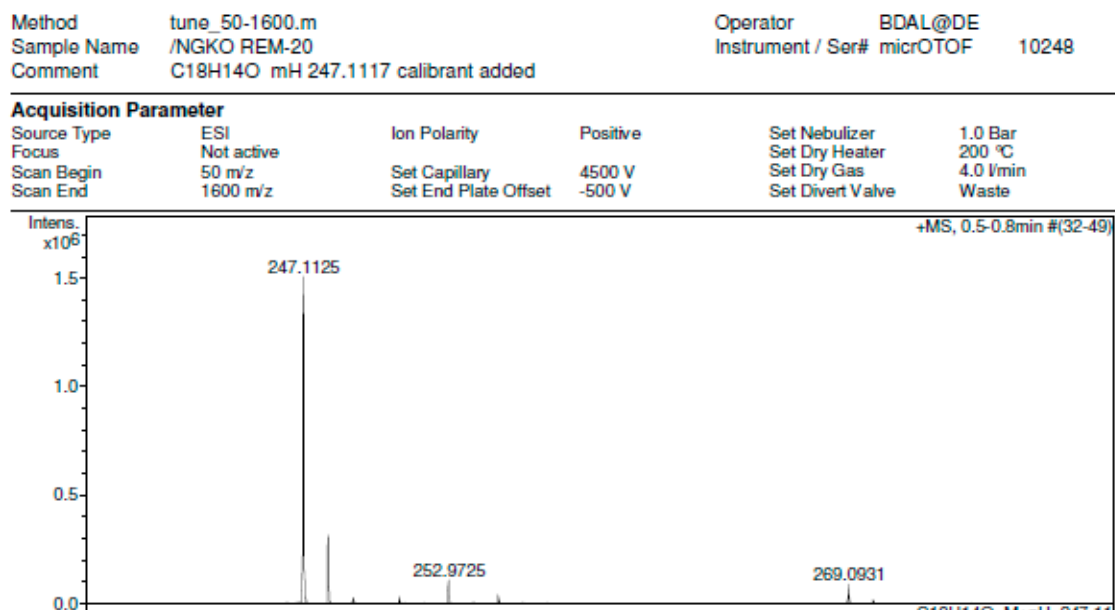

**Figure S3.** HRMS spectrum of compound **1a**.

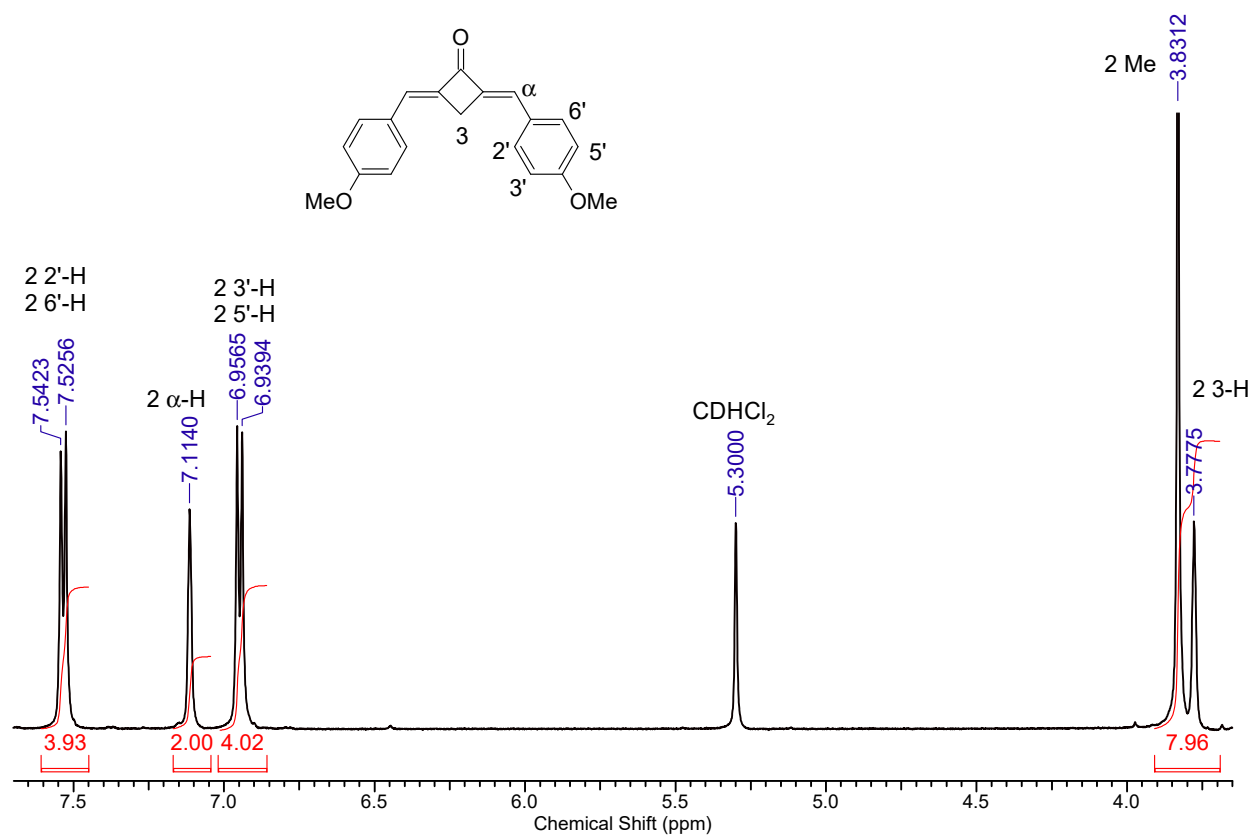

**Figure S4.**  $^1\text{H}$  NMR spectrum of compound **1b** in  $\text{CD}_2\text{Cl}_2$ .

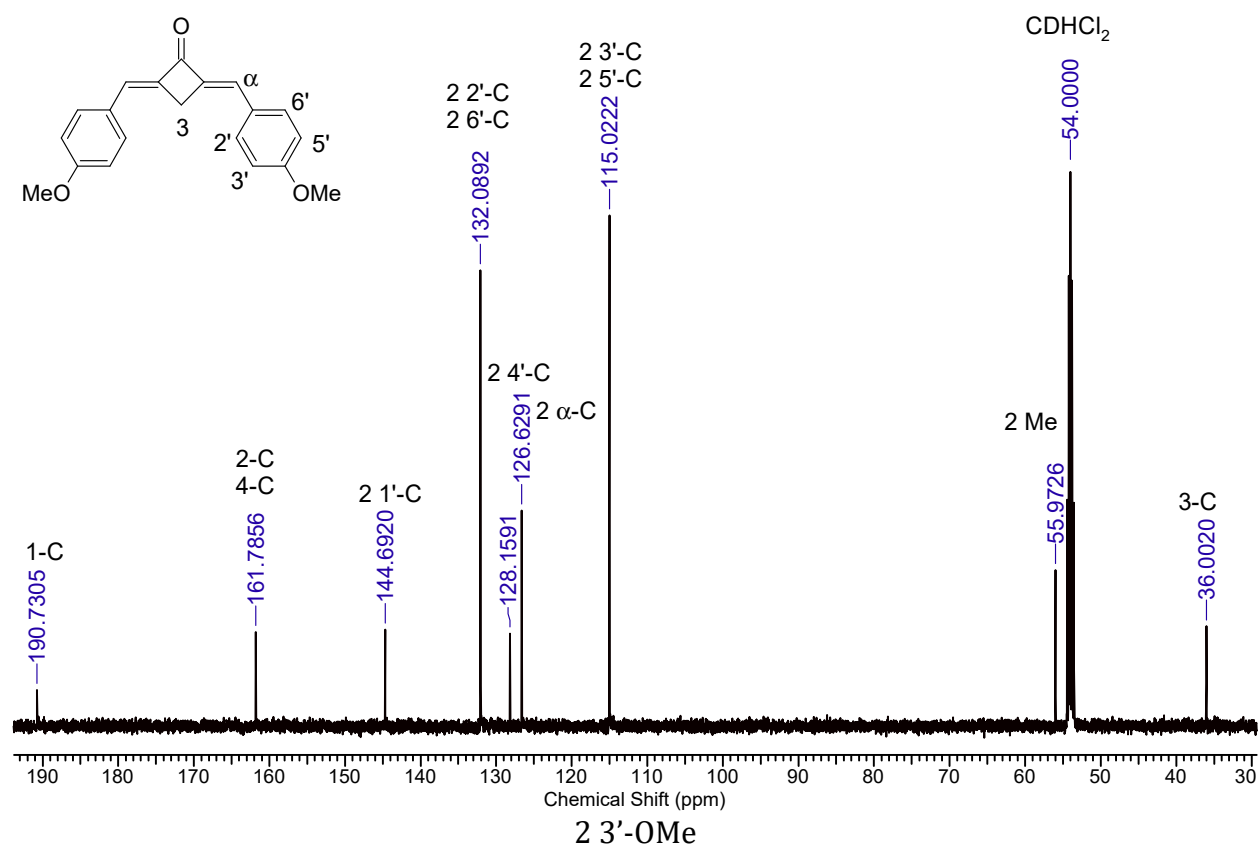

**Figure S5.**  $^{13}\text{C}$  NMR spectrum of compound **1b** in  $\text{CD}_2\text{Cl}_2$ .

|             |                                      |                   |                |
|-------------|--------------------------------------|-------------------|----------------|
| Method      | tune_50-1600.m                       | Operator          | BDAL@DE        |
| Sample Name | /NGKO REM-19                         | Instrument / Ser# | micrOTOF 10248 |
| Comment     | C20H18O3 mH 307.1328 calibrant added |                   |                |

# **Acquisition Parameter**

|             |            |                      |          |                  |           |
|-------------|------------|----------------------|----------|------------------|-----------|
| Source Type | ESI        | Ion Polarity         | Positive | Set Nebulizer    | 1.0 Bar   |
| Focus       | Not active |                      |          | Set Dry Heater   | 200 °C    |
| Scan Begin  | 50 m/z     | Set Capillary        | 4500 V   | Set Dry Gas      | 4.0 l/min |
| Scan End    | 1600 m/z   | Set End Plate Offset | -500 V   | Set Divert Valve | Waste     |

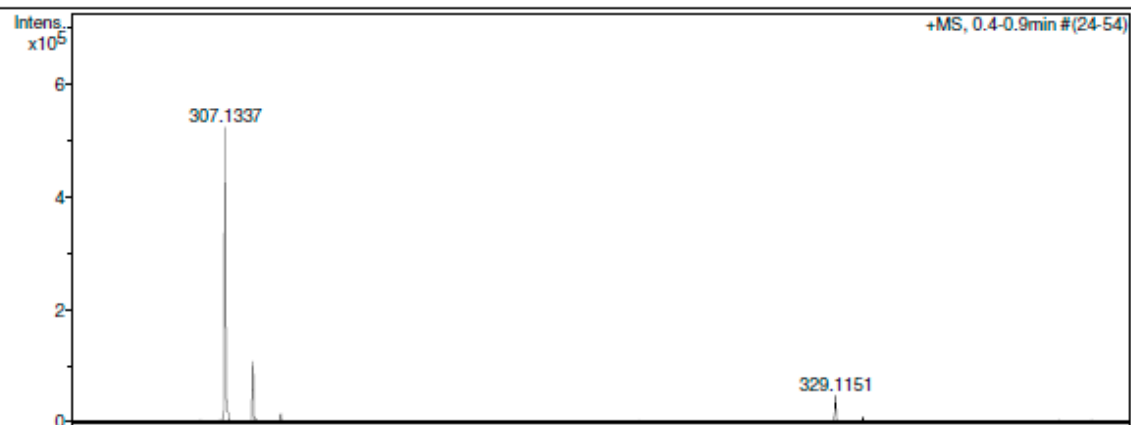

**Figure S6.** HRMS spectrum of compound **1b**.



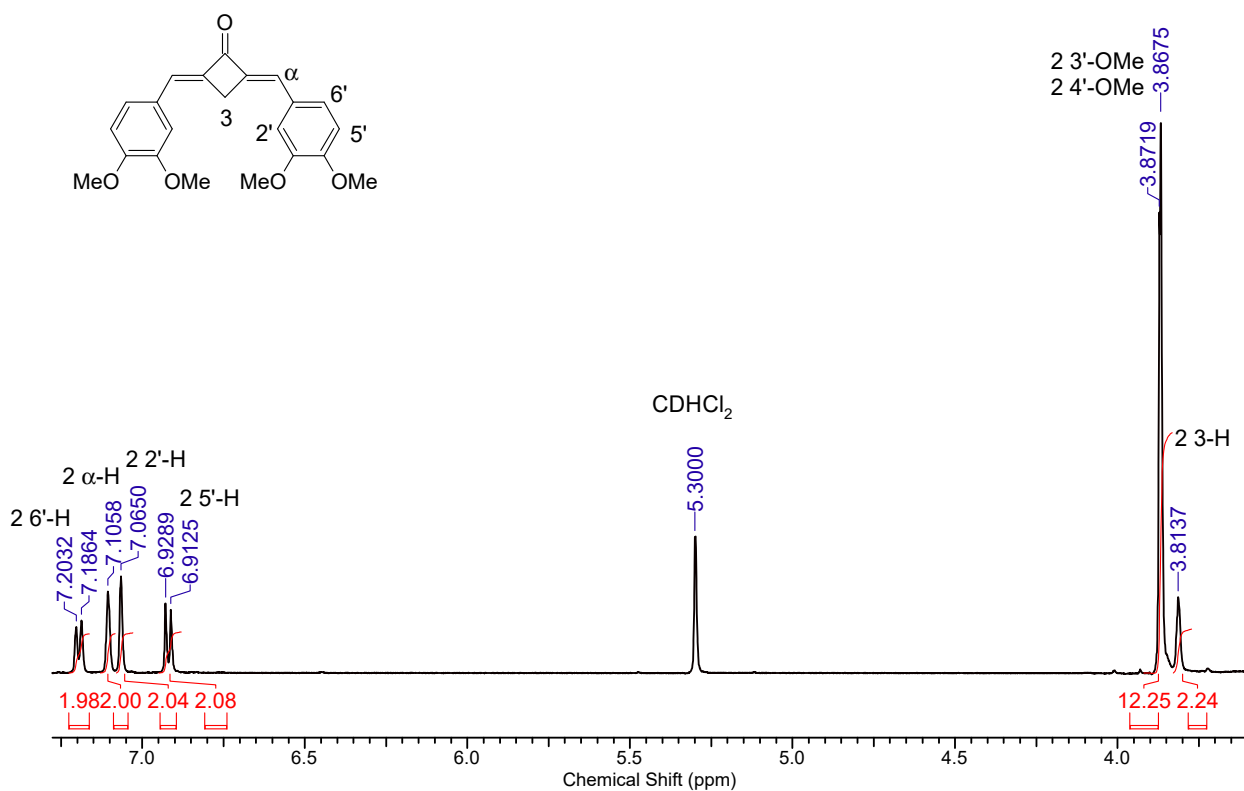

**Figure S7.**  $^1\text{H}$  NMR spectrum of compound **1c** in  $\text{CD}_2\text{Cl}_2$ .

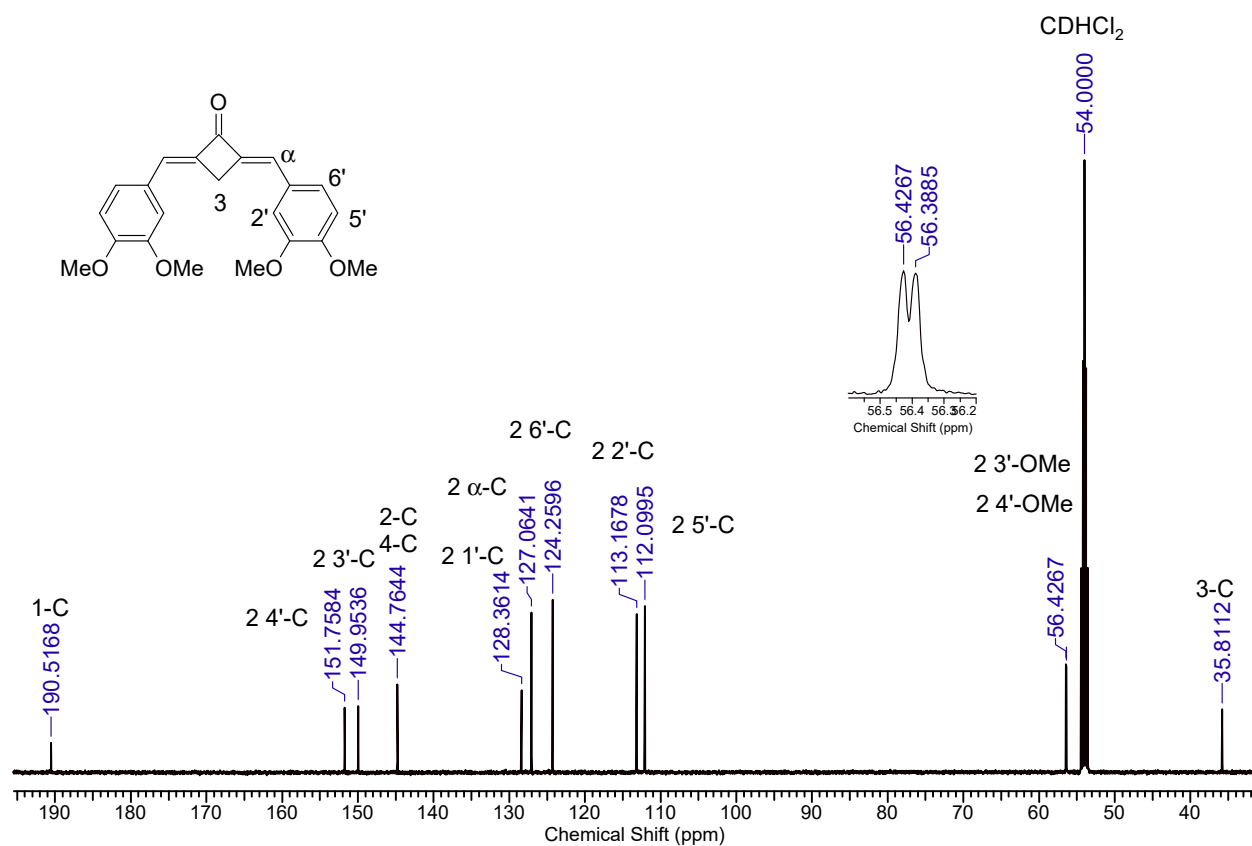

**Figure S8.**  $^{13}\text{C}$  NMR spectrum of compound **1c** in  $\text{CD}_2\text{Cl}_2$ .

# NOESY Spectrum

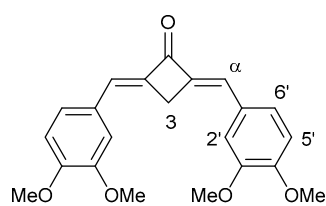

1c

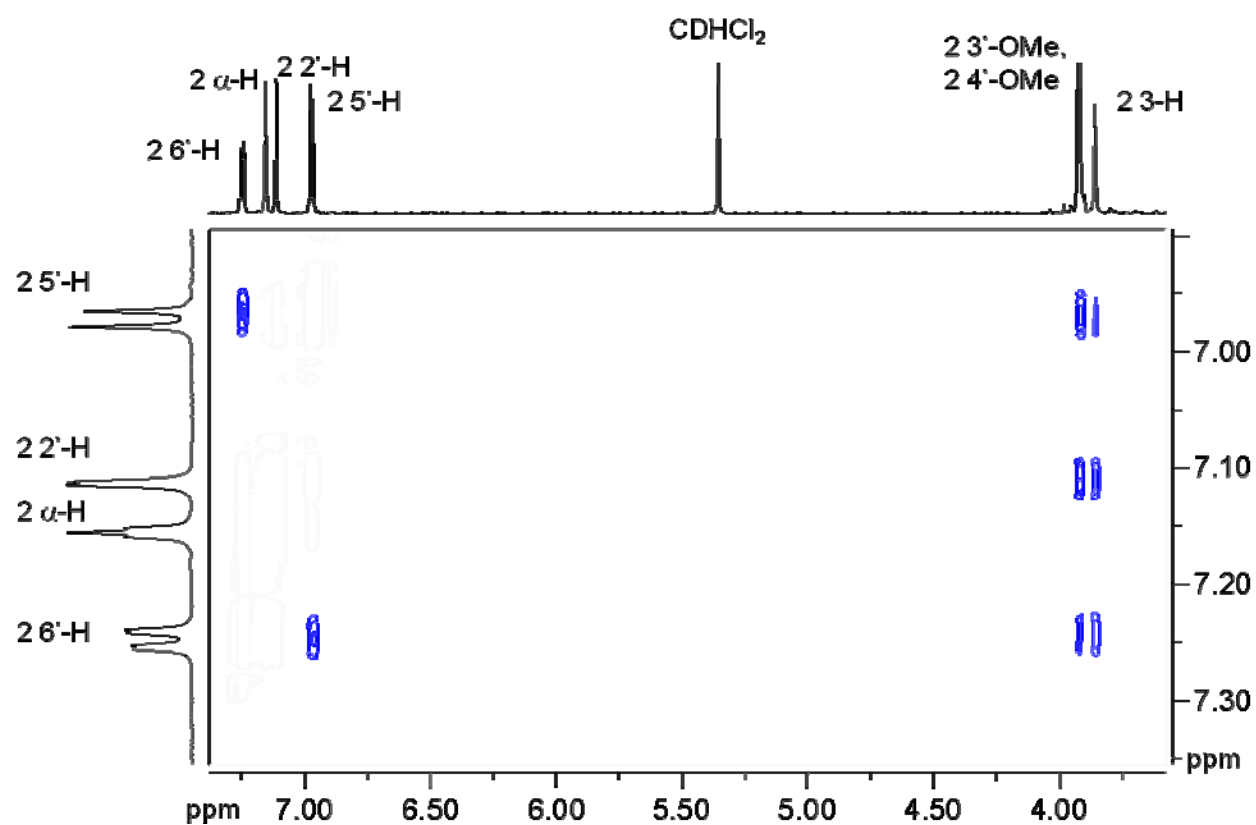

**Figure S9.** Fragment of the aromatic region of the NOESY (296 K, 600 MHz) spectrum of compound **1c** in CD<sub>2</sub>Cl<sub>2</sub>.

|             |                                      |                   |                |
|-------------|--------------------------------------|-------------------|----------------|
| Method      | tune_50-1600.m                       | Operator          | BDAL@DE        |
| Sample Name | /NGKO REM-16                         | Instrument / Ser# | micrOTOF 10248 |
| Comment     | C22H22O5 mH 367.1540 calibrant added |                   |                |

**Acquisition Parameter**

|             |            |                      |          |                  |           |
|-------------|------------|----------------------|----------|------------------|-----------|
| Source Type | ESI        | Ion Polarity         | Positive | Set Nebulizer    | 1.0 Bar   |
| Focus       | Not active |                      |          | Set Dry Heater   | 200 °C    |
| Scan Begin  | 50 m/z     | Set Capillary        | 4500 V   | Set Dry Gas      | 4.0 l/min |
| Scan End    | 1600 m/z   | Set End Plate Offset | -500 V   | Set Divert Valve | Waste     |

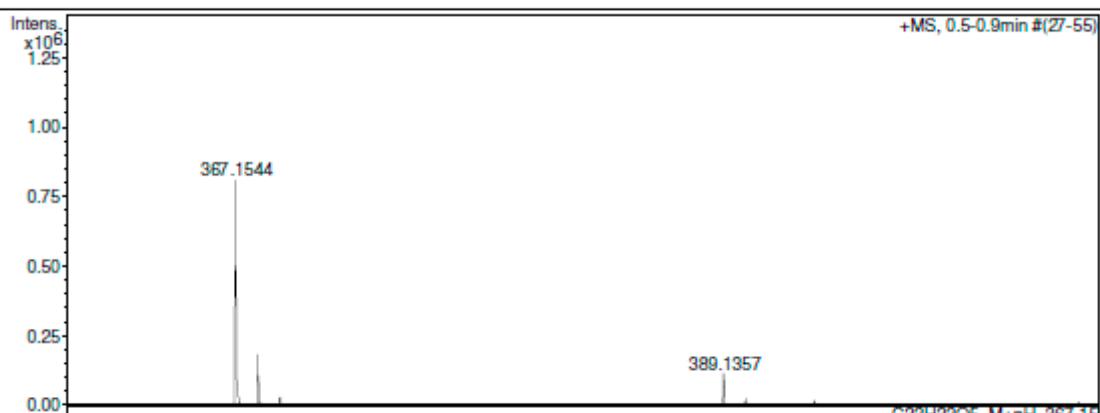

**Figure S10.** HRMS spectrum of compound **1c**.

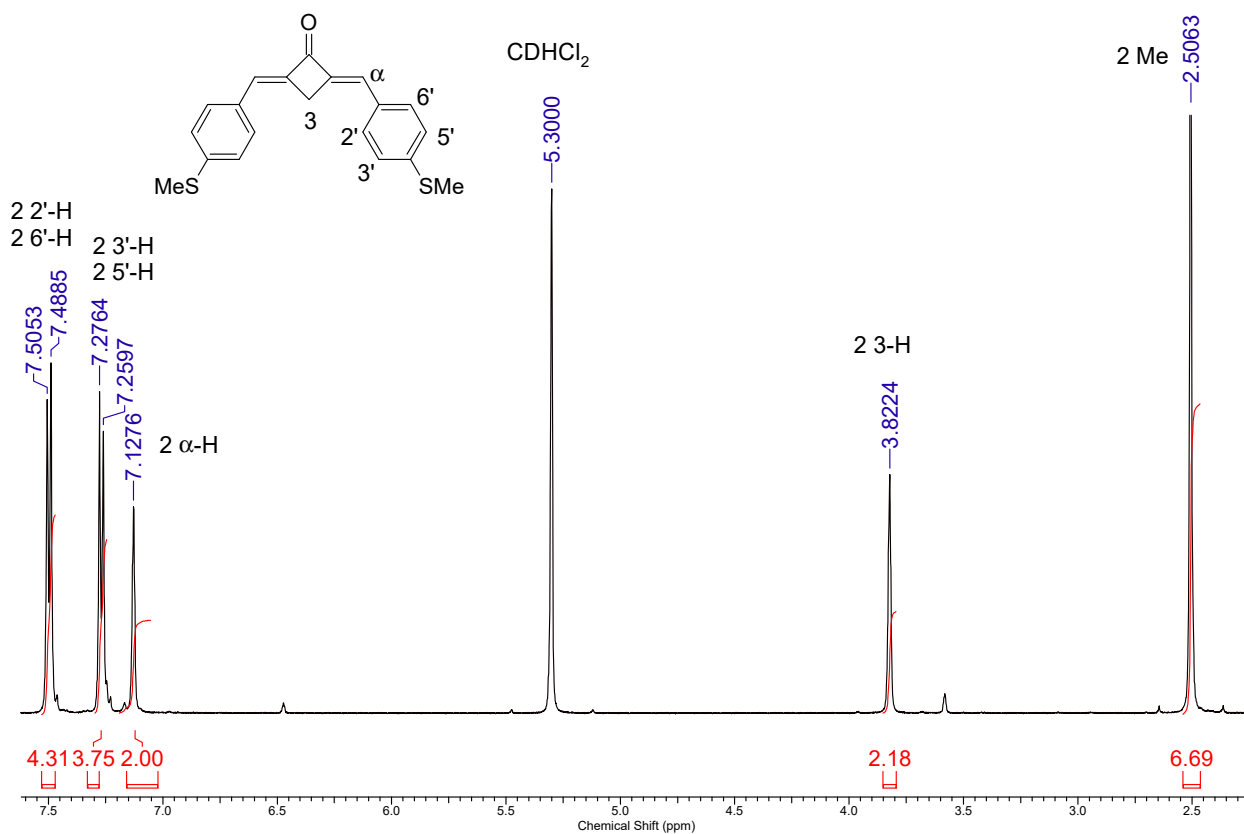

**Figure S11.**  $^1\text{H}$  NMR spectrum of compound **1d** in  $\text{CD}_2\text{Cl}_2$ .

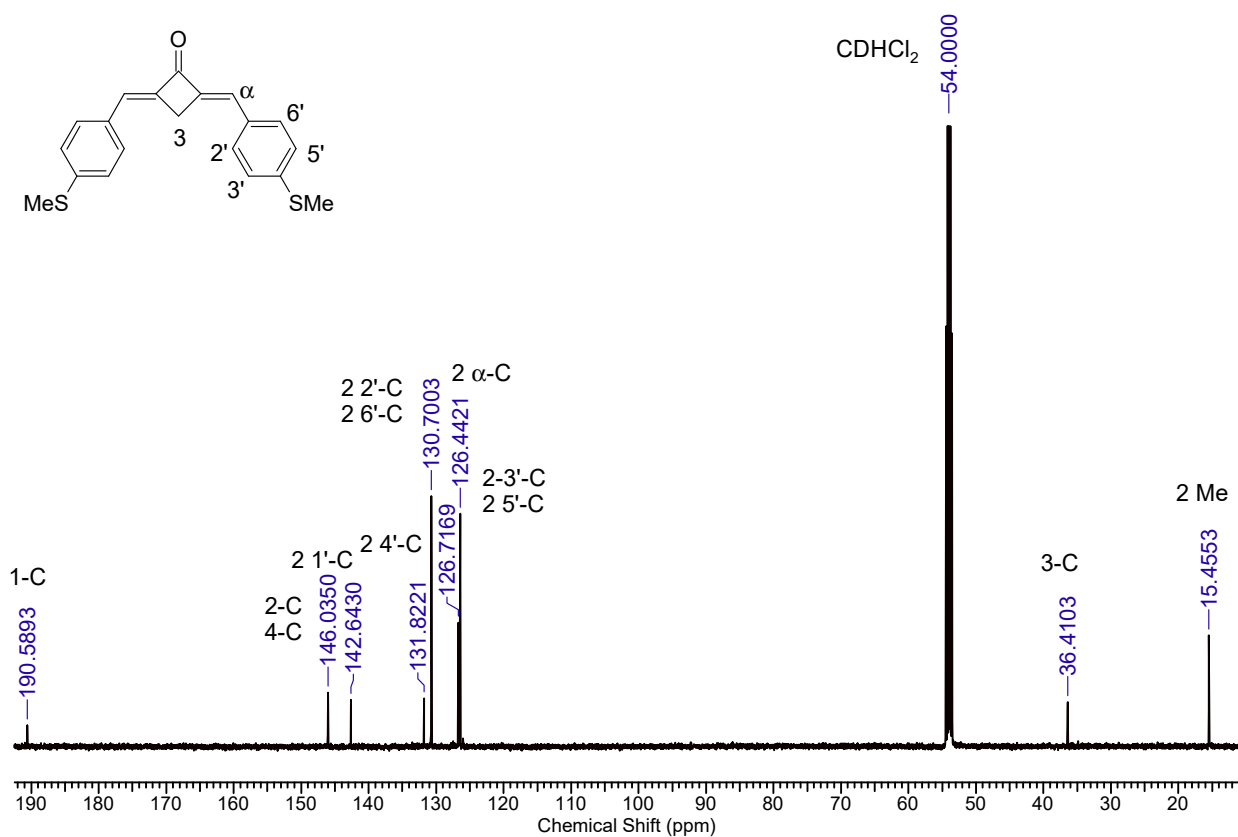

**Figure S12.**  $^{13}\text{C}$  NMR spectrum of compound **1d** in  $\text{CD}_2\text{Cl}_2$ .

Method tune\_50-1600.m  
Sample Name /NGKO REM-21  
Comment C20H18OS2 mH 339.0871 calibrant added

Operator BDAL@DE  
Instrument / Ser# microTOF 10248

**Acquisition Parameter**

|             |            |                      |          |                  |           |
|-------------|------------|----------------------|----------|------------------|-----------|
| Source Type | ESI        | Ion Polarity         | Positive | Set Nebulizer    | 1.0 Bar   |
| Focus       | Not active |                      |          | Set Dry Heater   | 200 °C    |
| Scan Begin  | 50 m/z     | Set Capillary        | 4500 V   | Set Dry Gas      | 4.0 l/min |
| Scan End    | 1600 m/z   | Set End Plate Offset | -500 V   | Set Divert Valve | Waste     |

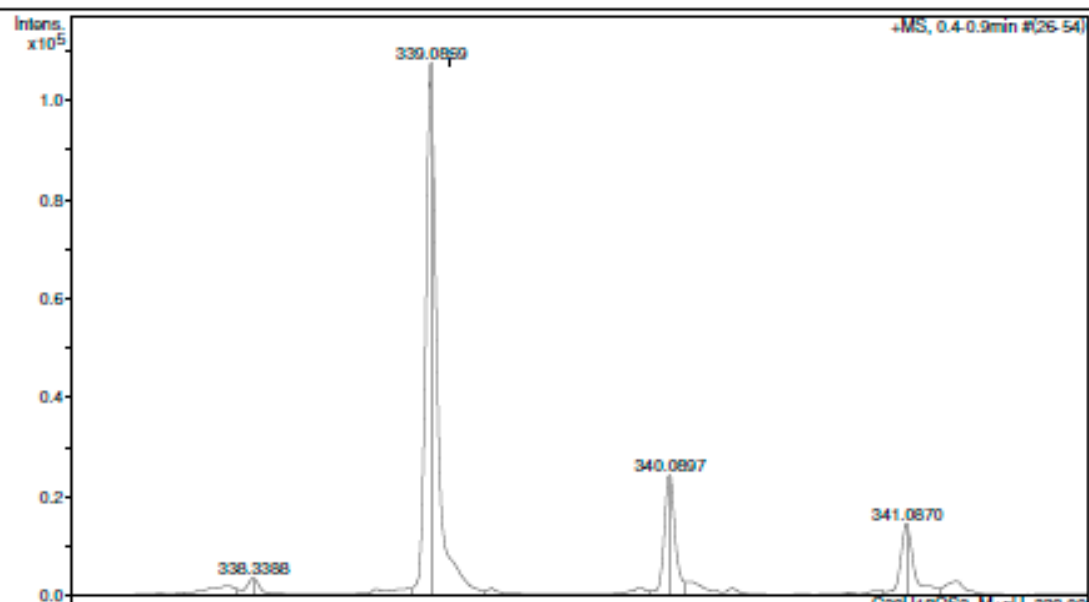

**Figure S13.** HRMS spectrum of compound **1d**.

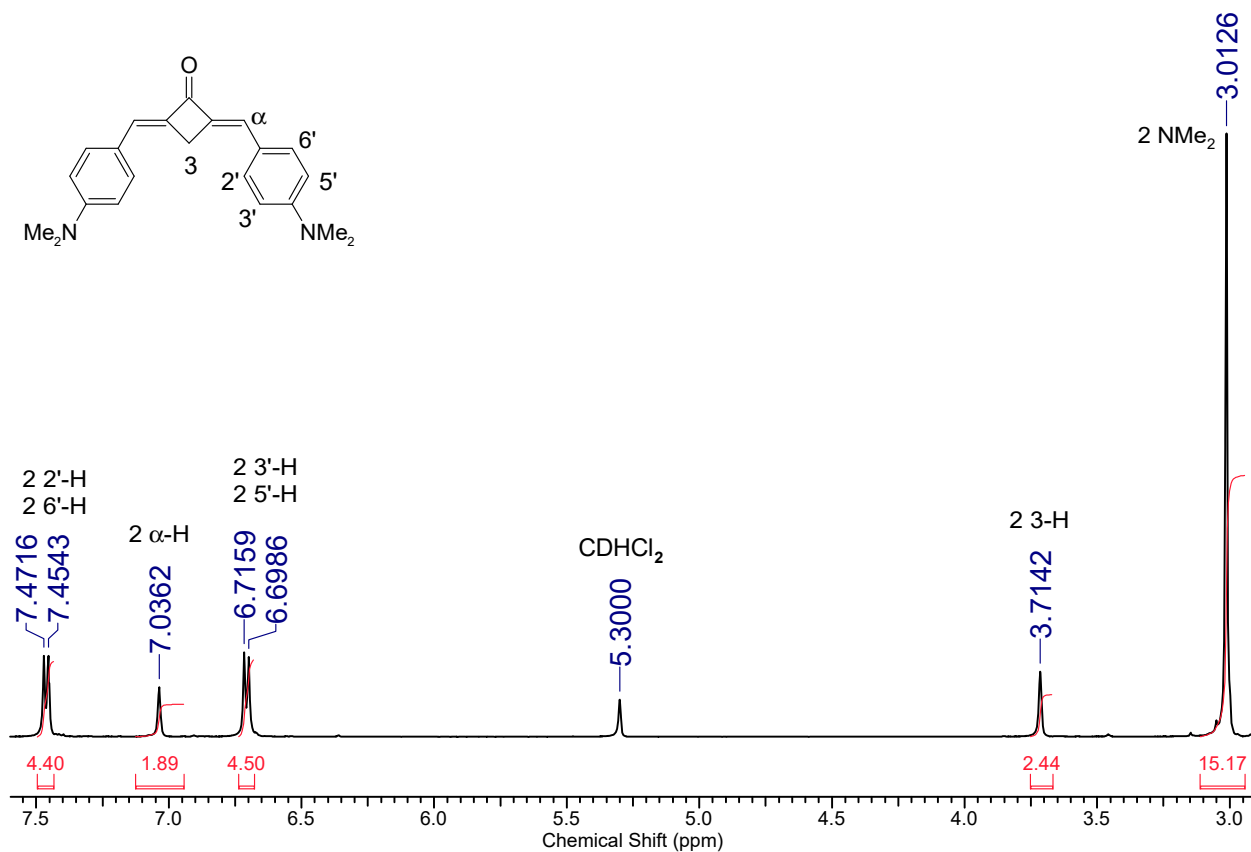

**Figure S14.**  $^1\text{H}$  NMR spectrum of compound **1e** in  $\text{CD}_2\text{Cl}_2$ .

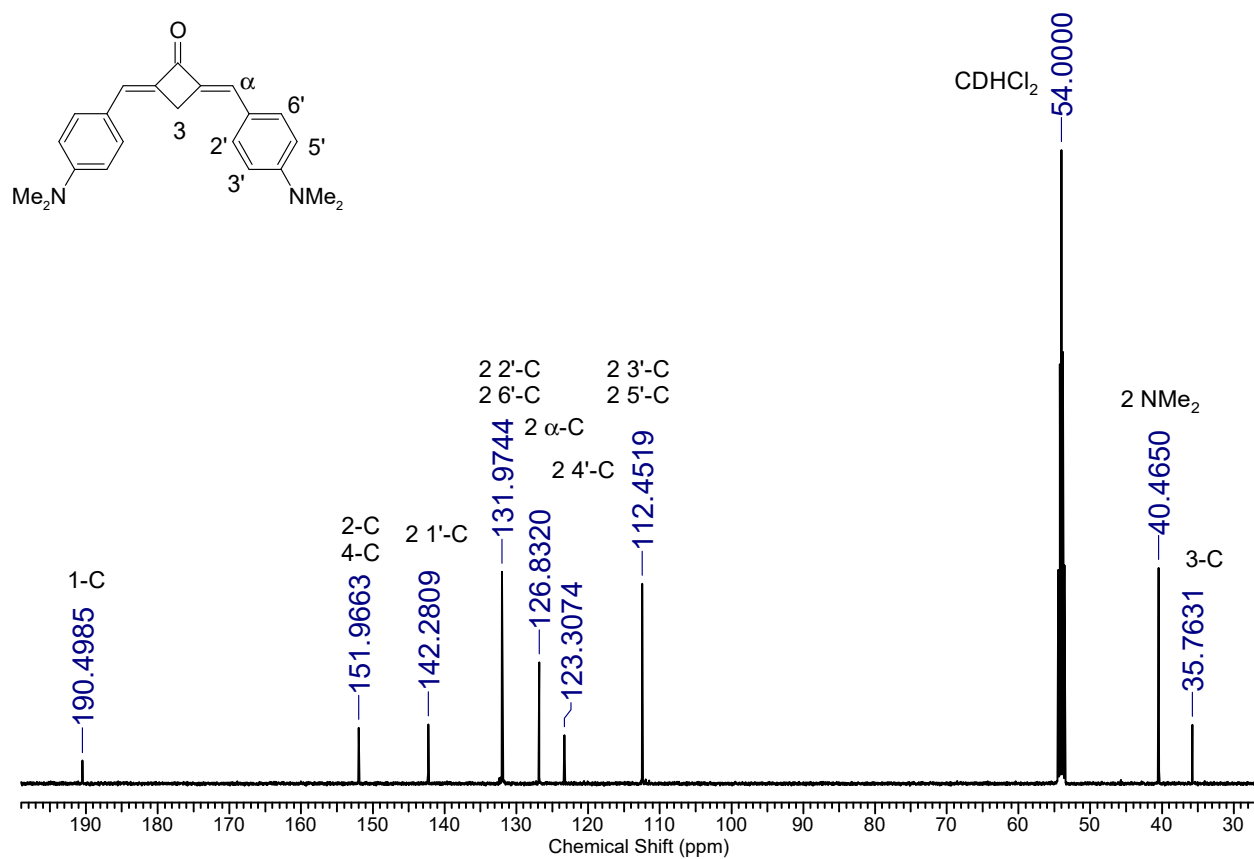

**Figure S15.**  $^{13}\text{C}$  NMR spectrum of compound **1e** in  $\text{CD}_2\text{Cl}_2$ .

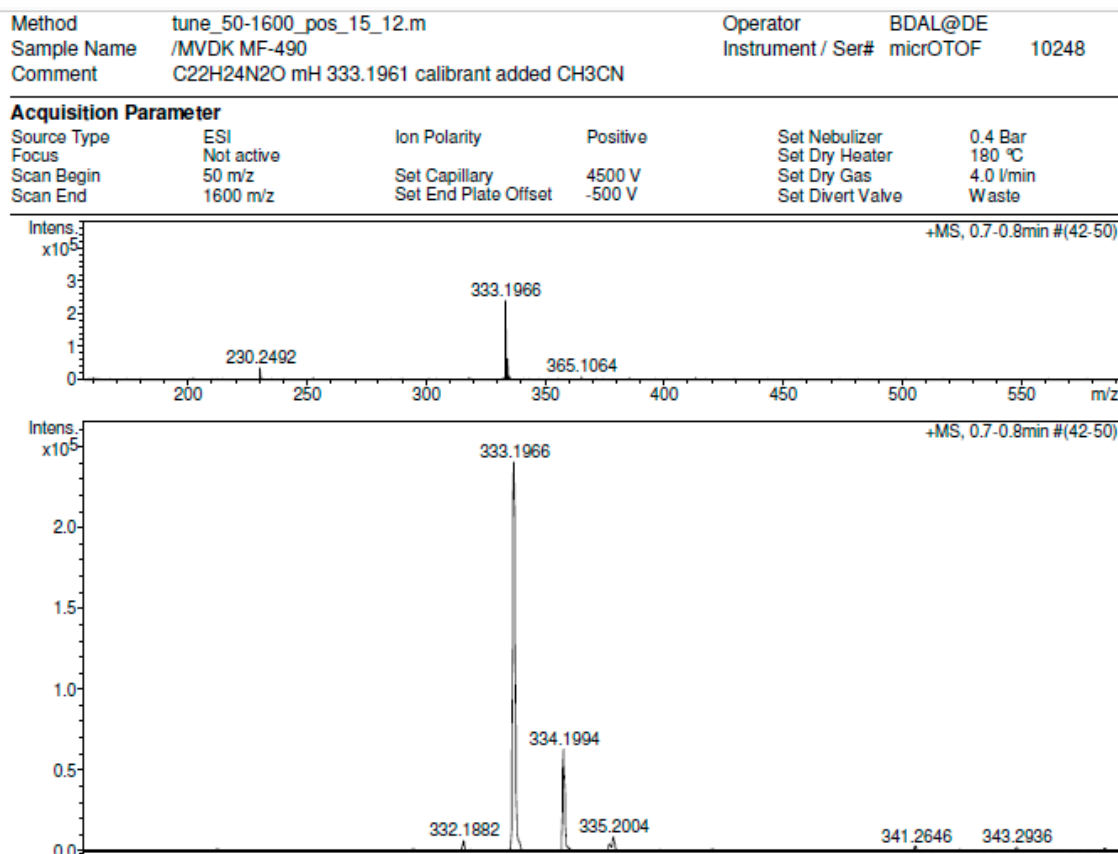

**Figure S16.** HRMS spectrum of compound **1e**.

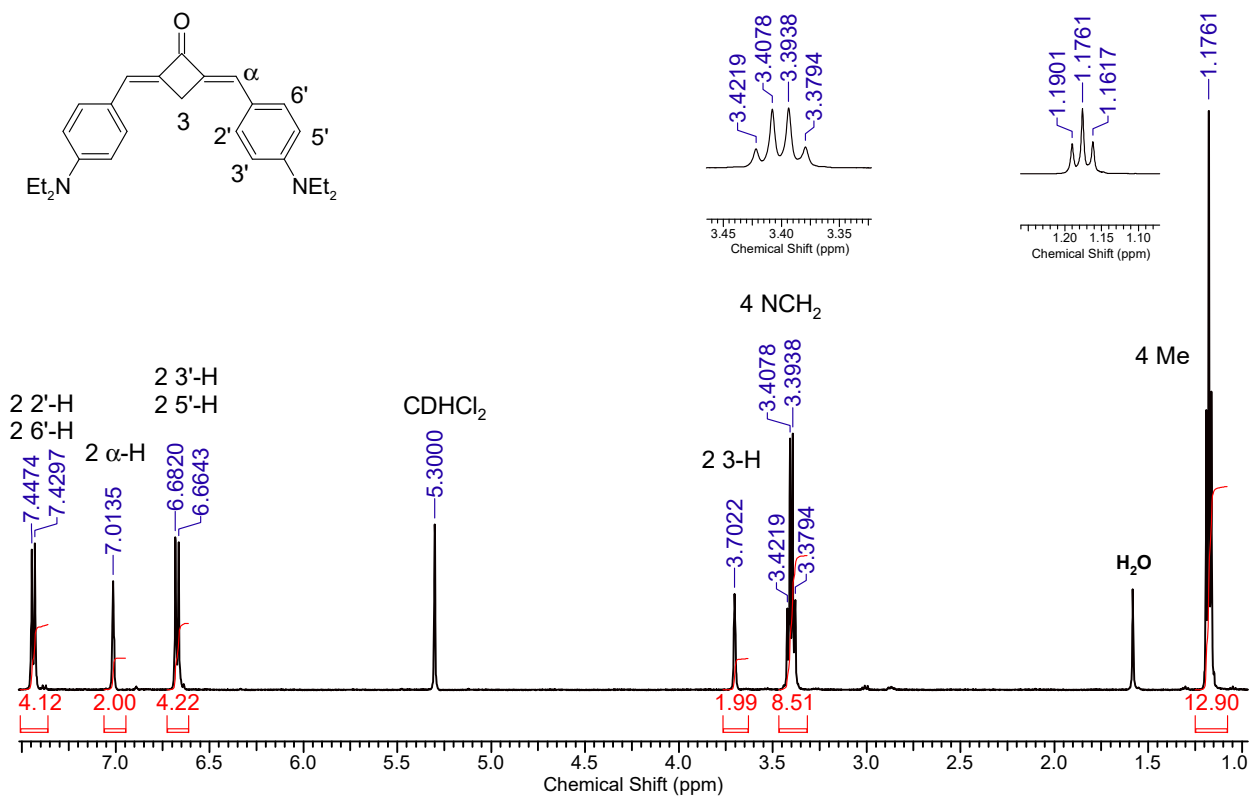

**Figure S17.** <sup>1</sup>H NMR spectrum of compound **1f** in CD<sub>2</sub>Cl<sub>2</sub>.

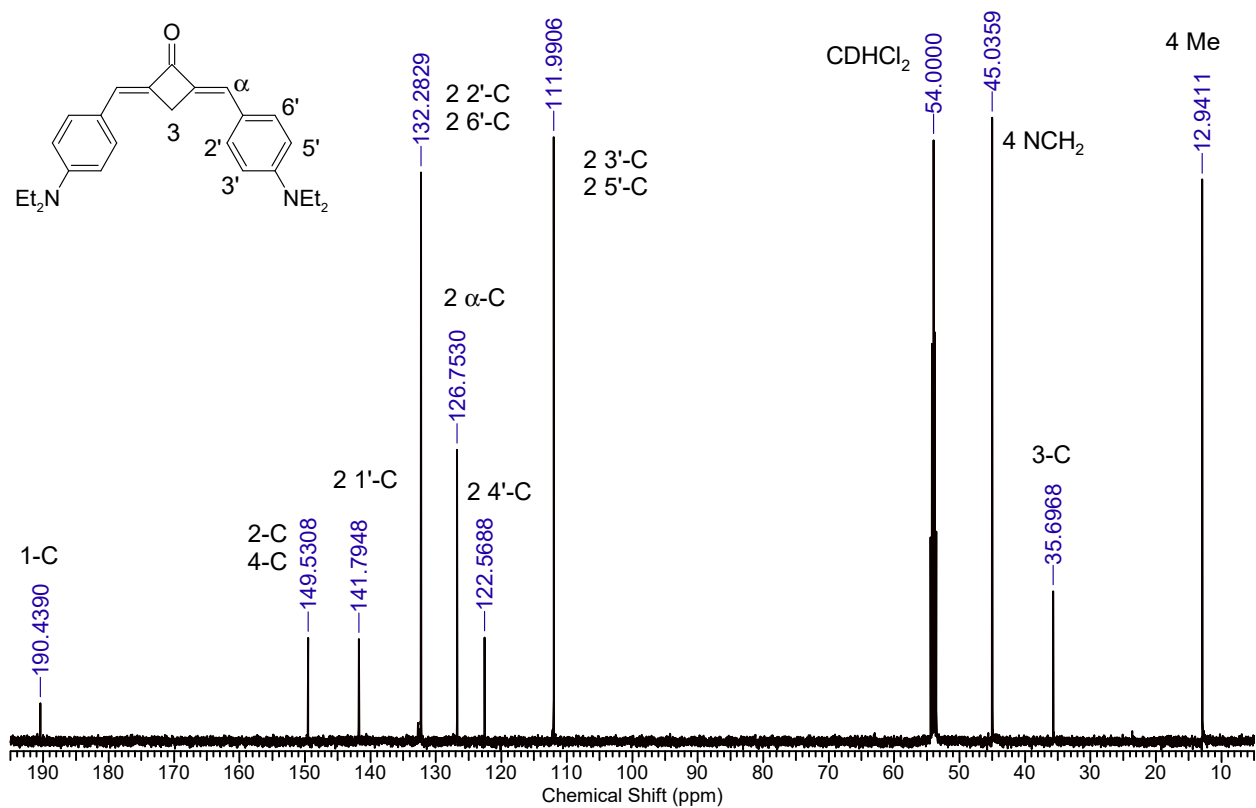

**Figure S18.** <sup>13</sup>C NMR spectrum of compound **1f** in CD<sub>2</sub>Cl<sub>2</sub>.



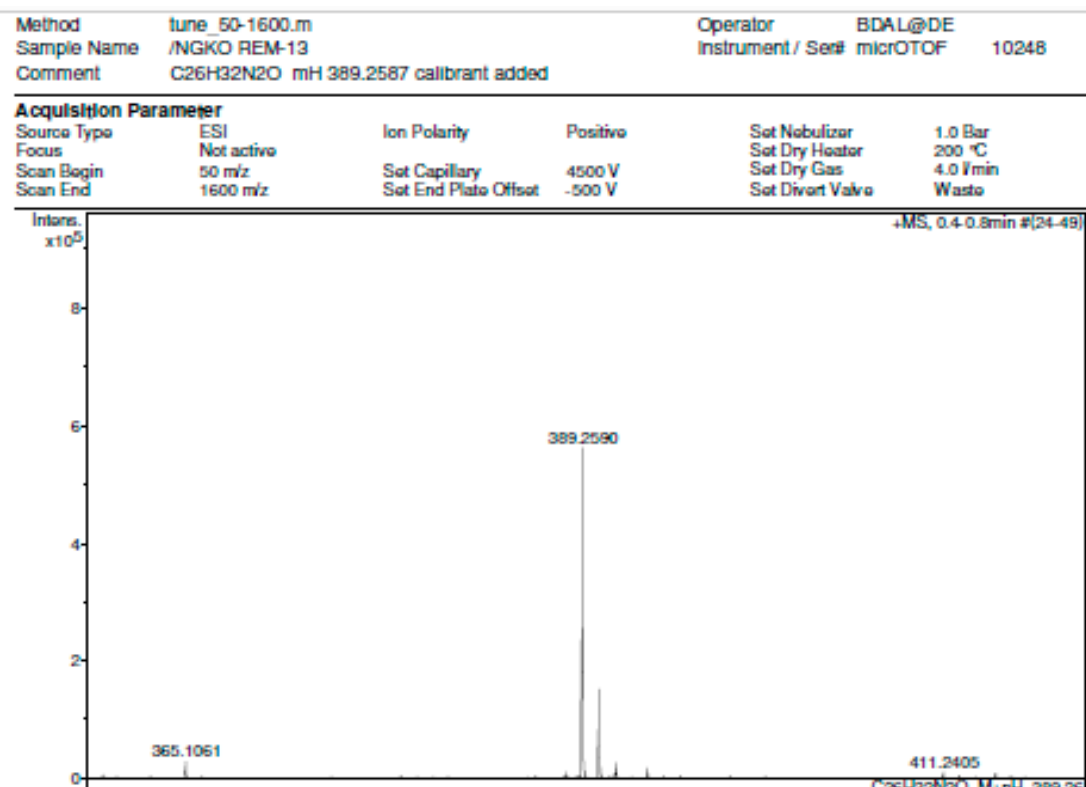

Figure S19. HRMS spectrum of compound 1f.

### III Fluorescence spectra of compounds 1c-f (Figure S20)

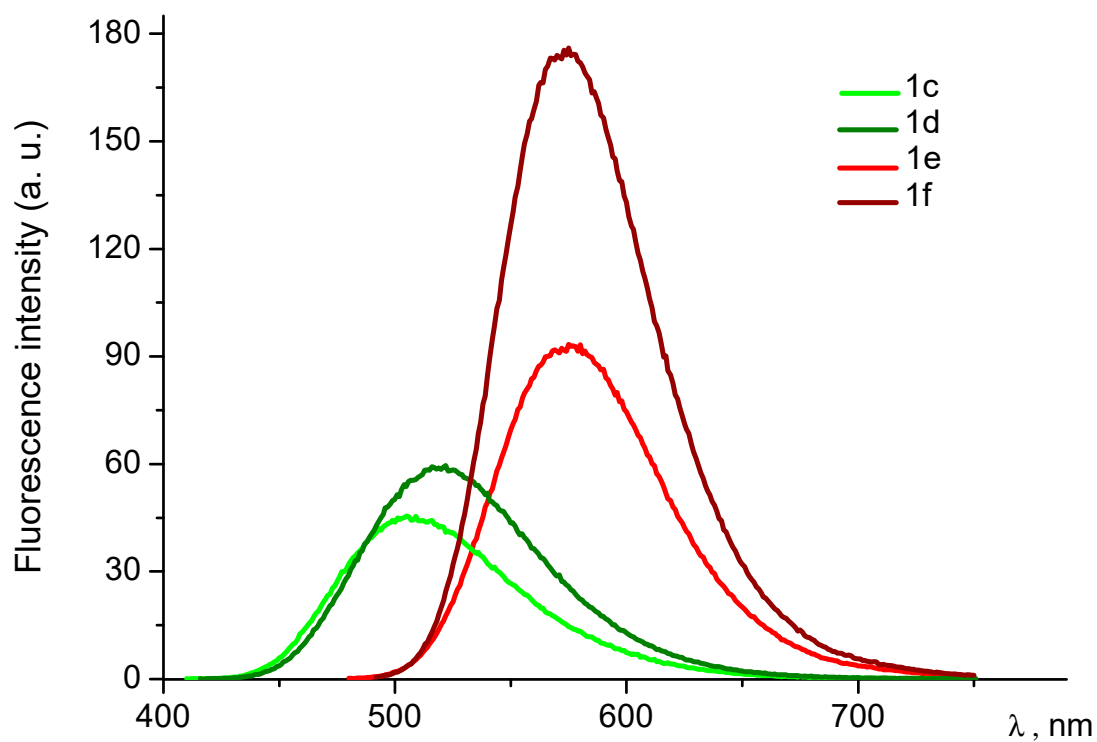

**Figure S20.** Fluorescence spectra of dienones **1c-f** ( $C = 0.5 \times 10^{-6}$  M) in MeCN.

IV Quantum chemical calculations, orbitals involved in the first electron transition of compounds 1b-f (Figures S21-S25)

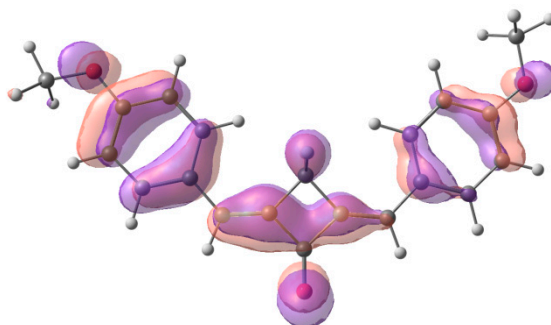

$\pi$  orbital (HOMO-1) of compound **1b**

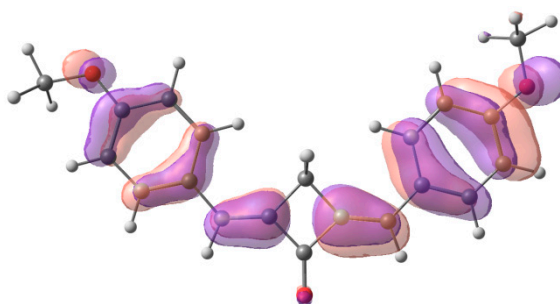

$\pi$  orbital (HOMO) of compound **1b**

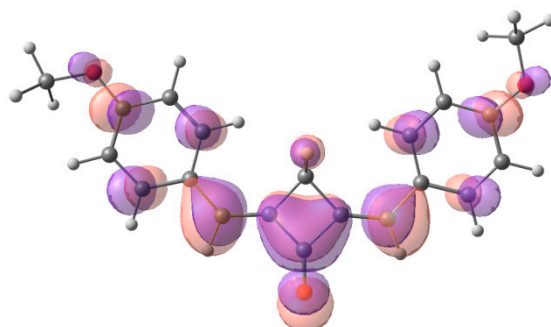

$\pi^*$  orbital (LUMO) of compound **1b**

**Figure S21.** Orbitals involved in the first electron transition of compound **1b**.

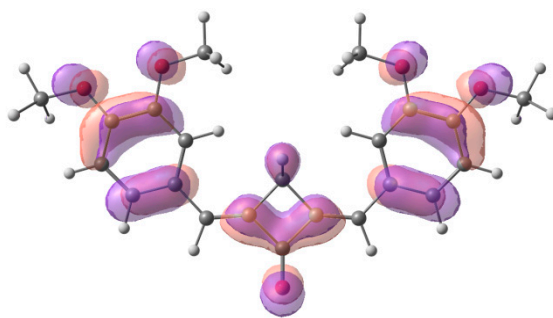

$\pi$  orbital (HOMO-1) of compound **1c**

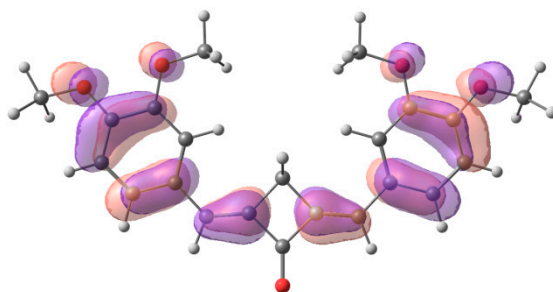

$\pi$  orbital (HOMO) of compound **1c**

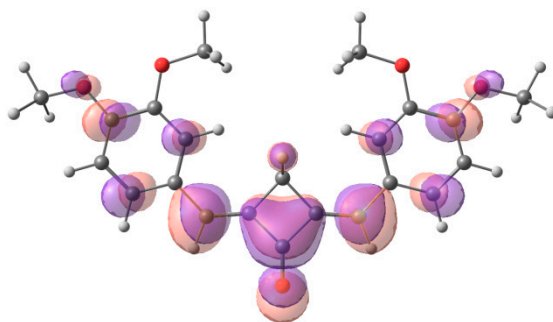

$\pi^*$  orbital (LUMO) of compound **1c**

**Figure S22.** Orbitals involved in the first electron transition of compound **1c**.

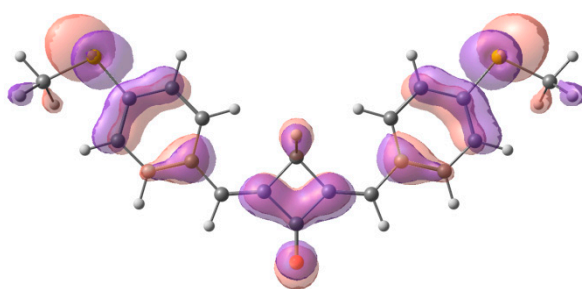

$\pi$  orbital (HOMO-1) of compound **1d**

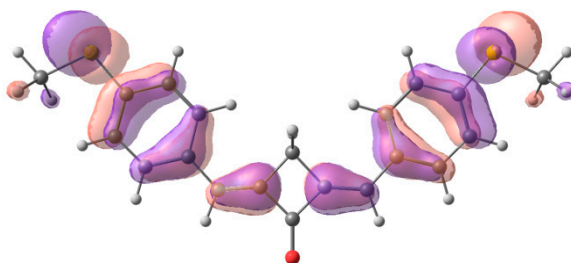

$\pi$  orbital (HOMO) of compound **1d**

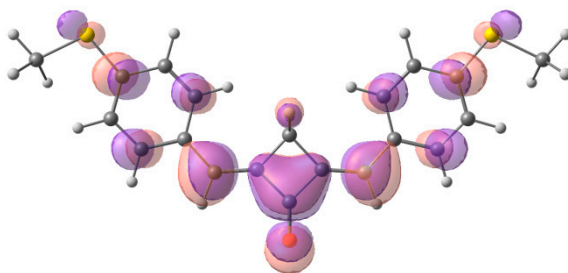

$\pi^*$  orbital (LUMO) of compound **1d**

**Figure S23.** Orbitals involved in the first electron transition of compound **1d**.

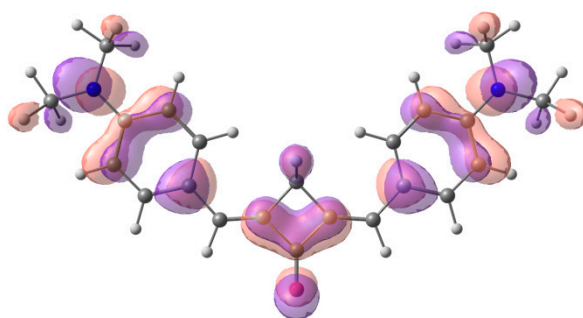

$\pi$  orbital (HOMO-1) of compound **1e**

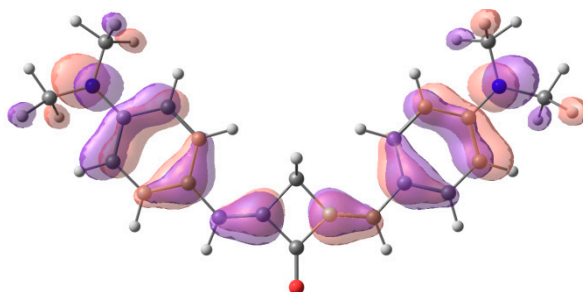

$\pi$  orbital (HOMO) of compound **1e**

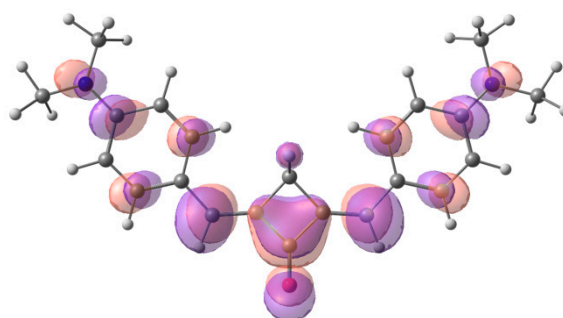

$\pi^*$  orbital (LUMO) of compound **1e**

**Figure S24.** Orbitals involved in the first electron transition of compound **1e**.

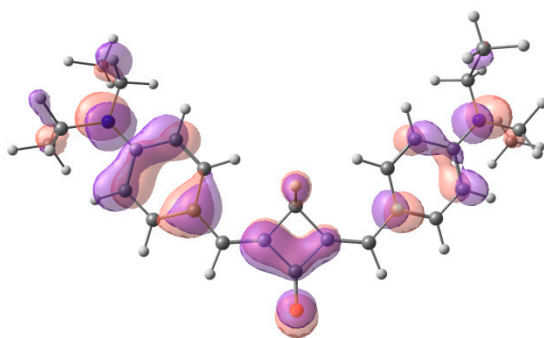

$\pi$  orbital (HOMO-1) of compound **1f**

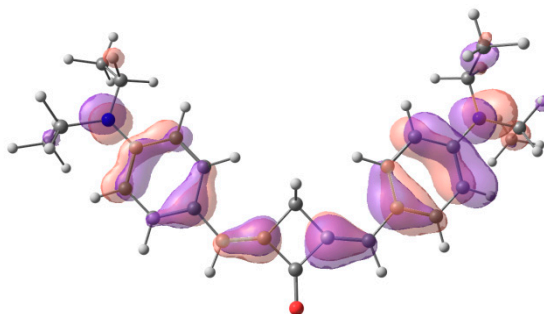

$\pi$  orbital (HOMO) of compound **1f**

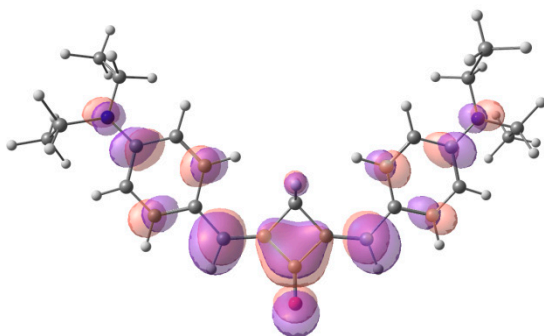

$\pi^*$  orbital (LUMO) of compound **1f**

**Figure S25.** Orbitals involved in the first electron transition of compound **1f**.

**V Quantum chemical calculations, potential energy profiles of the ground S0 and lowest excited states of compounds 1a-f (Figures S26-S32)**

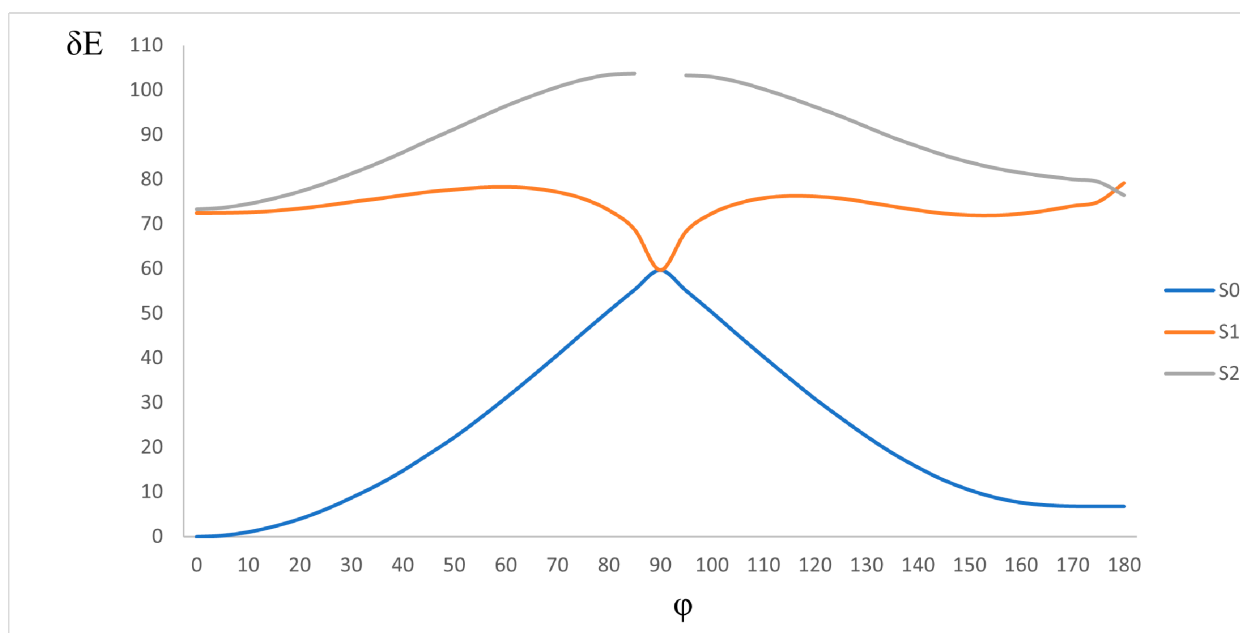

**Figure S26.** Potential energy profiles of compound **1a**.

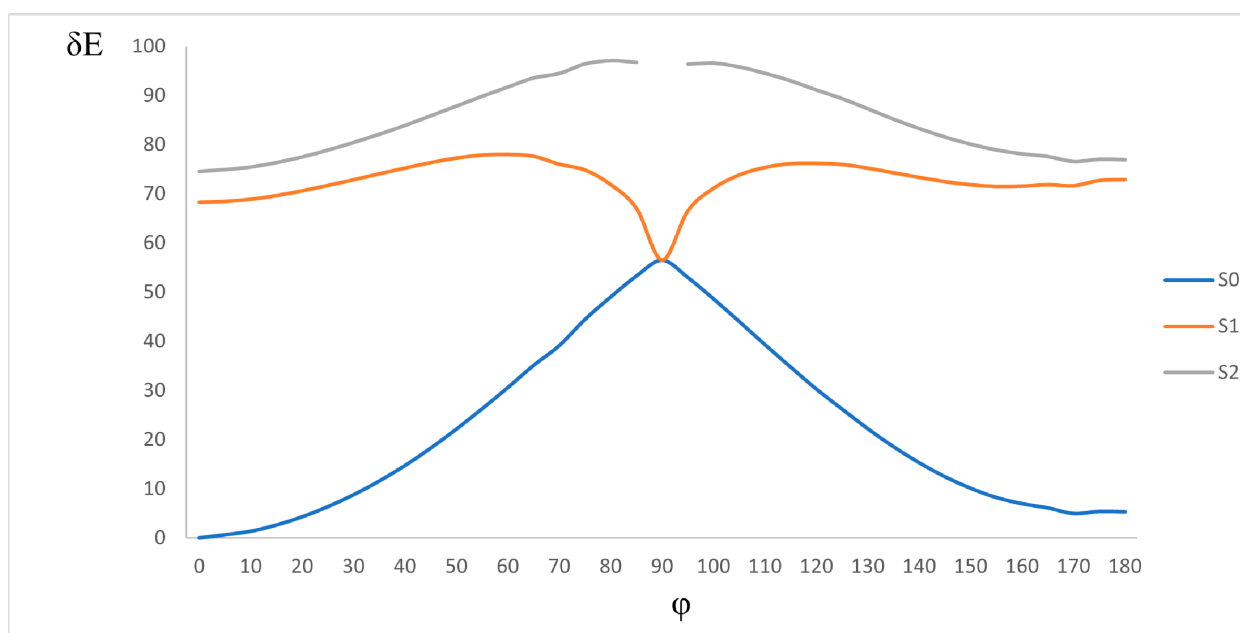

**Figure S27.** Potential energy profiles of compound **1b**.



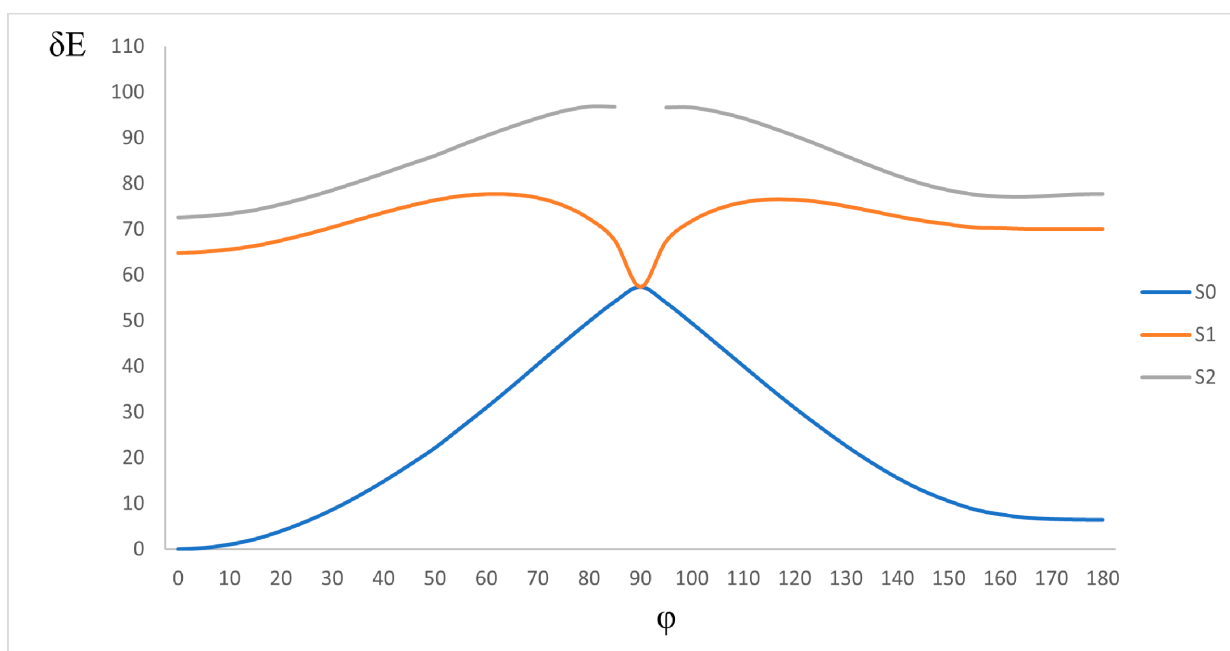

**Figure S28.** Potential energy profiles of compound **1c**.

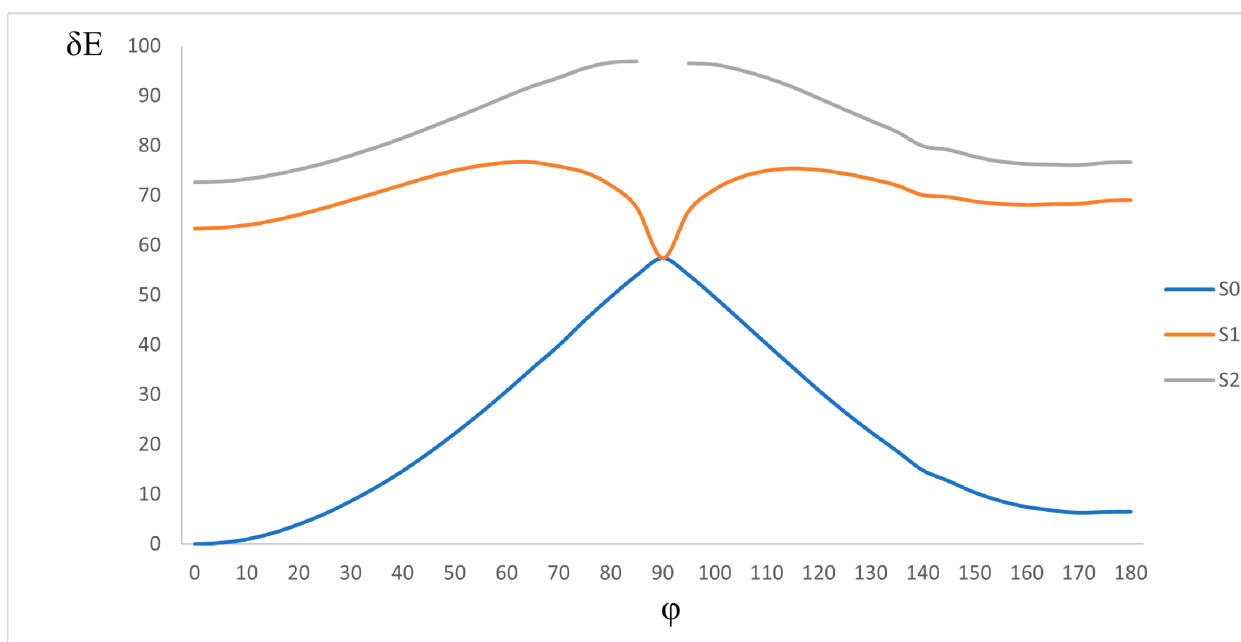

**Figure S29.** Potential energy profiles of compound **1d**.

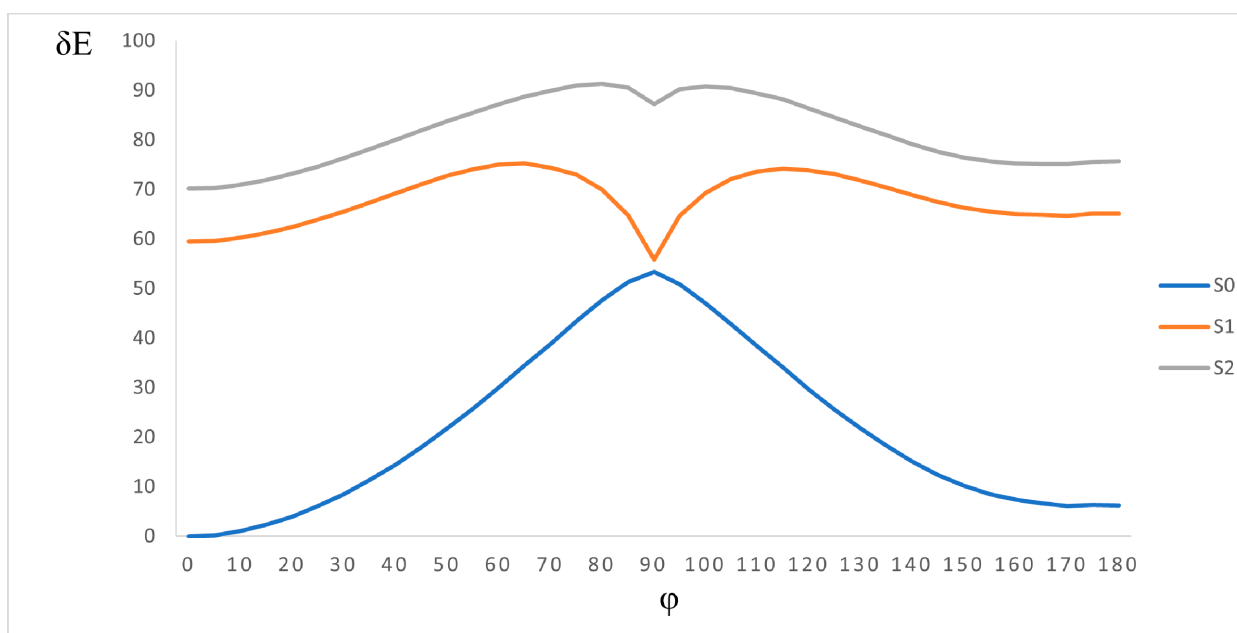

**Figure S30.** Potential energy profiles of compound **1e**.

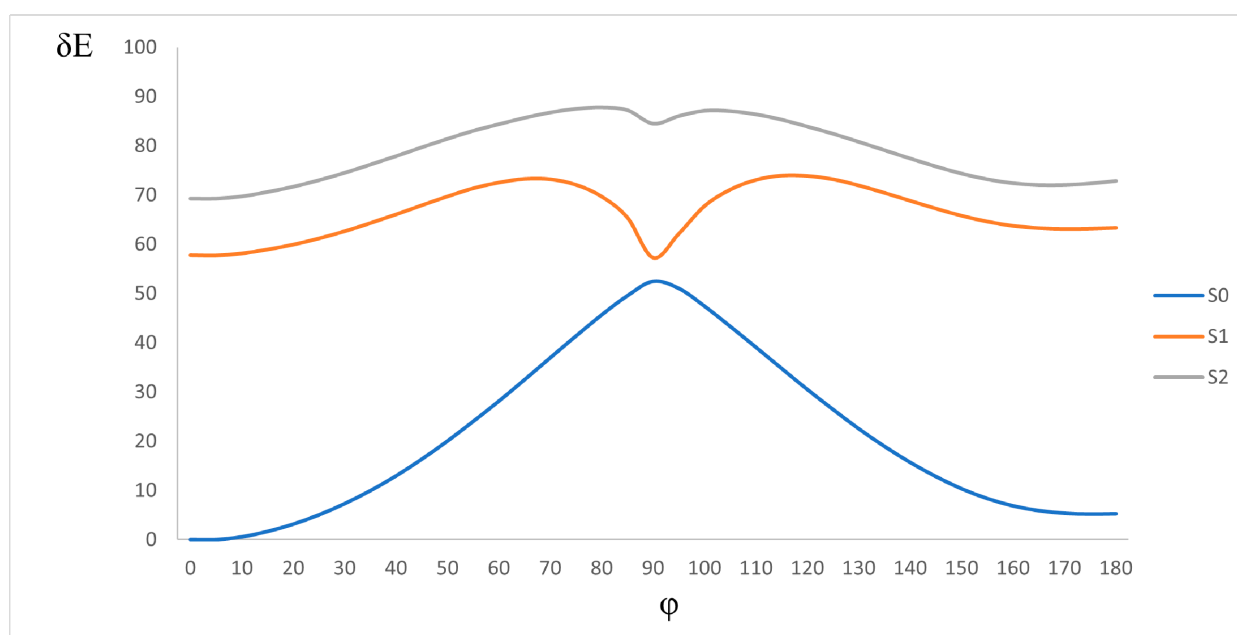

**Figure S31.** Potential energy profiles of compound **1f**.

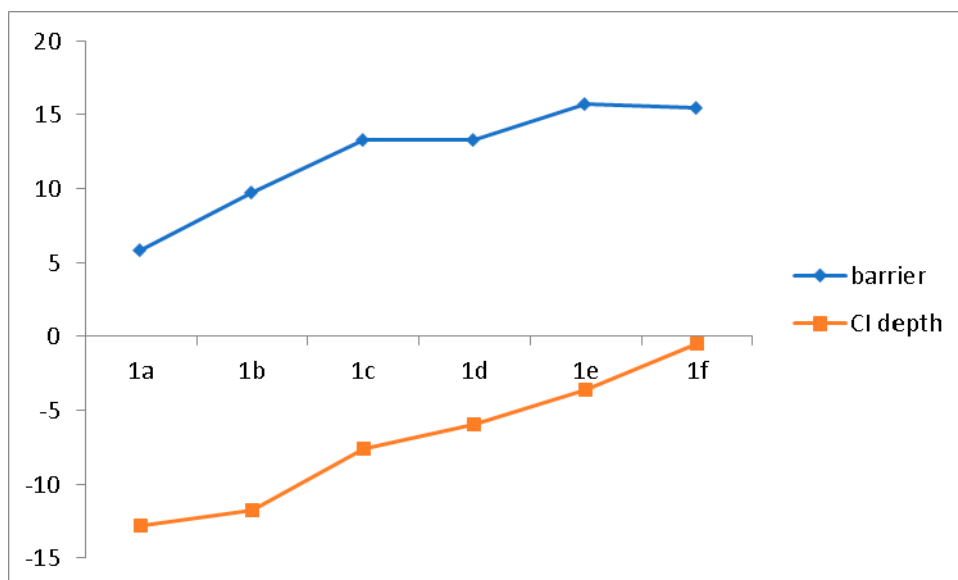

**Figure S32.** *E-Z* isomerization barrier height and CI depth in the series.

**VI Correlations between the calculated frontier orbital energies, ionization potential and electron affinities, and experimental oxidation and reduction potentials (Figures S33-S35)**

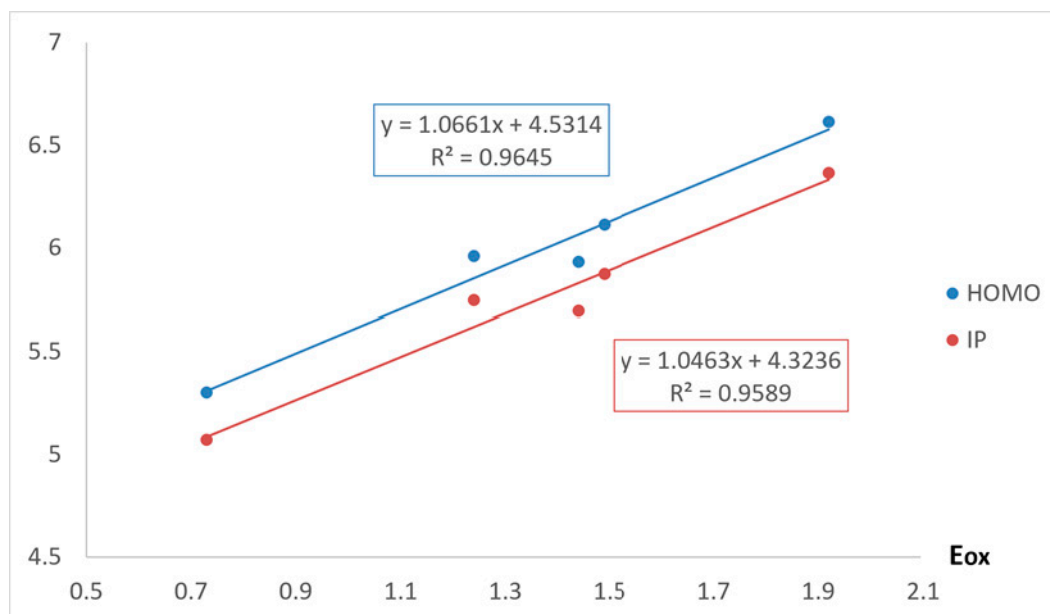

**Figure S33.** Correlations of HOMO, HOMO-1 energy, and calculated ionization potential with  $E_{ox}$ . Color of the frame with regression equation and correlation coefficient corresponds to the color of the trend line.

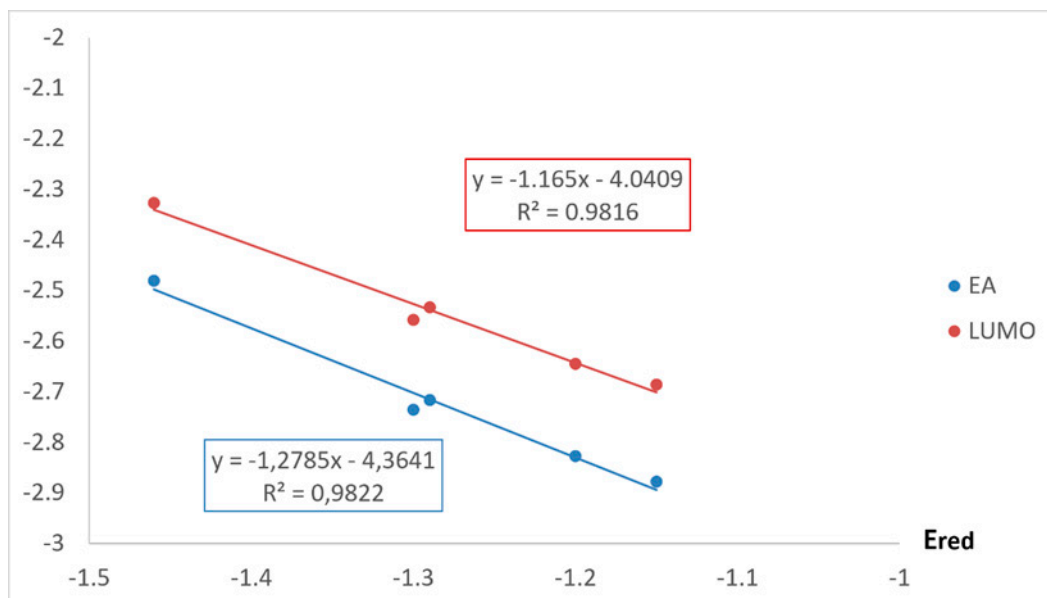

**Figure S34.** Correlations of LUMO energy and calculated electron affinity with  $E_{red}$ . Color of the frame with regression equation and correlation coefficient corresponds to the color of the trend line.

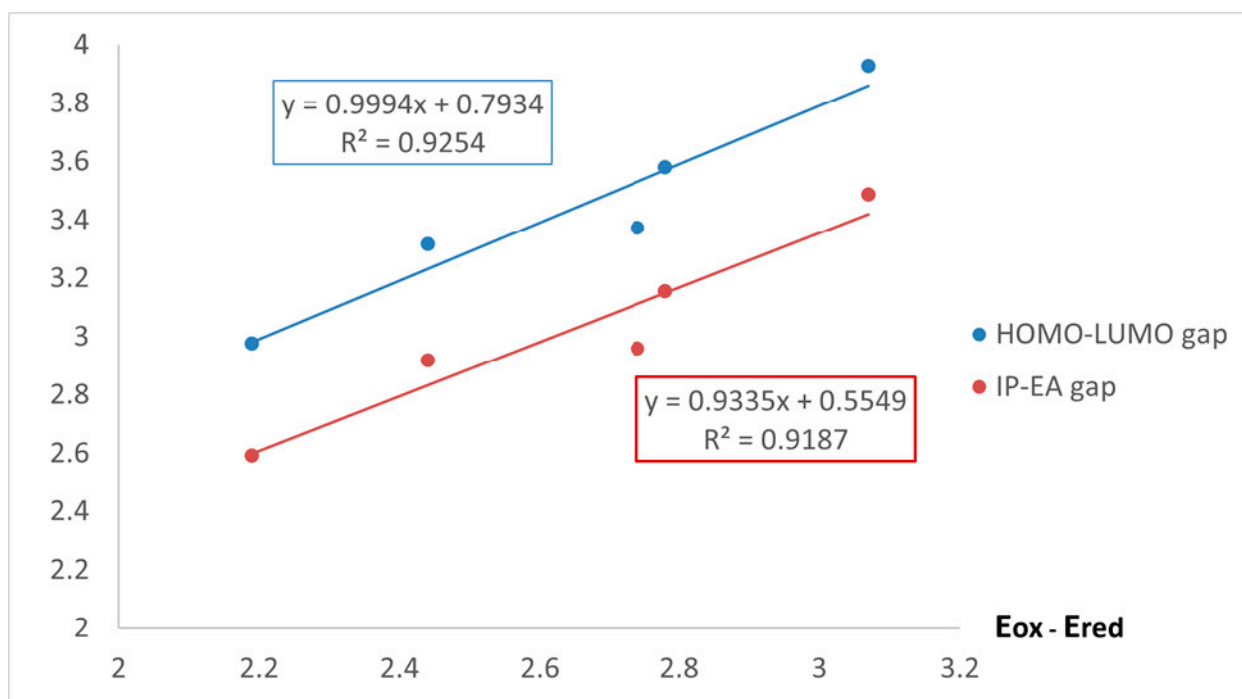

**Figure S35.** Correlations of the HOMO-LUMO gap and IP-EA difference with  $E_{ox} - E_{red}$ . Color of the frame with regression equation and correlation coefficient corresponds to the color of the trend line.
